# Supplementary material for: Brain injury environment critically influences the connectivity of transplanted neurons
Source: bioRxiv or medRxiv preprint supplement (doi:10.1101/2021.12.13.472270), 2021-12-14

| Gene symbol | Description                                                                                              | Abundance Ratio: (ipsi) / (intact) | Abundance Ratio P-Value: (ipsi) / (intact) |
|-------------|----------------------------------------------------------------------------------------------------------|------------------------------------|--------------------------------------------|
| C4b         | Complement C4-B OS=Mus musculus OX=10090 GN=C4b PE=1 SV=3                                                | 100,00                             | 0,0000                                     |
| Serpinc1    | Antithrombin-III OS=Mus musculus OX=10090 GN=Serpinc1 PE=1 SV=1                                          | 12,07                              | 0,0000                                     |
| Gfap        | Glial fibrillary acidic protein OS=Mus musculus OX=10090 GN=Gfap PE=1 SV=4                               | 7,65                               | 0,0000                                     |
| Serpina1e   | Alpha-1-antitrypsin 1-5 OS=Mus musculus OX=10090 GN=Serpina1e PE=1 SV=1                                  | 6,96                               | 0,0000                                     |
| Itih2       | Inter-alpha-trypsin inhibitor heavy chain H2 OS=Mus musculus OX=10090 GN=Itih2 PE=1 SV=1                 | 6,92                               | 0,0000                                     |
| Alb         | Serum albumin OS=Mus musculus OX=10090 GN=Alb PE=1 SV=3                                                  | 5,80                               | 0,0000                                     |
| Serpina1a   | Alpha-1-antitrypsin 1-1 OS=Mus musculus OX=10090 GN=Serpina1a PE=1 SV=4                                  | 5,79                               | 0,0000                                     |
| Ces1c       | Carboxylesterase 1C OS=Mus musculus OX=10090 GN=Ces1c PE=1 SV=4                                          | 5,28                               | 0,0000                                     |
| Tgm1        | Protein-glutamine gamma-glutamyltransferase K OS=Mus musculus OX=10090 GN=Tgm1 PE=1 SV=2                 | 5,15                               | 0,0000                                     |
| Serpina6    | Corticosteroid-binding globulin OS=Mus musculus OX=10090 GN=Serpina6 PE=1 SV=1                           | 5,09                               | 0,0000                                     |
| Gc          | Vitamin D-binding protein OS=Mus musculus OX=10090 GN=Gc PE=1 SV=2                                       | 4,74                               | 0,0000                                     |
| Serpina1b   | Alpha-1-antitrypsin 1-2 OS=Mus musculus OX=10090 GN=Serpina1b PE=1 SV=2                                  | 4,59                               | 0,0000                                     |
| Apoh        | Beta-2-glycoprotein 1 OS=Mus musculus OX=10090 GN=Apoh PE=1 SV=1                                         | 3,99                               | 0,0000                                     |
| Vtn         | Vitronectin OS=Mus musculus OX=10090 GN=Vtn PE=1 SV=2                                                    | 3,88                               | 0,0000                                     |
| C3          | Complement C3 OS=Mus musculus OX=10090 GN=C3 PE=1 SV=3                                                   | 3,58                               | 0,0000                                     |
| Serpina3k   | Serine protease inhibitor A3K OS=Mus musculus OX=10090 GN=Serpina3k PE=1 SV=2                            | 3,44                               | 0,0000                                     |
| Tf          | Serotransferrin OS=Mus musculus OX=10090 GN=Tf PE=1 SV=1                                                 | 3,41                               | 0,0000                                     |
| Vim         | Vimentin OS=Mus musculus OX=10090 GN=Vim PE=1 SV=3                                                       | 3,21                               | 0,0000                                     |
| Itih3       | Inter-alpha-trypsin inhibitor heavy chain H3 OS=Mus musculus OX=10090 GN=Itih3 PE=1 SV=3                 | 3,11                               | 0,0000                                     |
| H2-D1       | H-2 class I histocompatibility antigen, D-B alpha chain OS=Mus musculus OX=10090 GN=H2-D1 PE=1 SV=2      | 3,09                               | 0,0000                                     |
| Mug1        | Murino-globulin-1 OS=Mus musculus OX=10090 GN=Mug1 PE=1 SV=3                                             | 3,02                               | 0,0000                                     |
| Itih1       | Inter-alpha-trypsin inhibitor heavy chain H1 OS=Mus musculus OX=10090 GN=Itih1 PE=1 SV=2                 | 3,00                               | 0,0000                                     |
| Fgg         | Fibrinogen gamma chain OS=Mus musculus OX=10090 GN=Fgg PE=1 SV=1                                         | 2,94                               | 0,0000                                     |
| F2          | Prothrombin OS=Mus musculus OX=10090 GN=F2 PE=1 SV=1                                                     | 2,84                               | 0,0000                                     |
| Fabp7       | Fatty acid-binding protein, brain OS=Mus musculus OX=10090 GN=Fabp7 PE=1 SV=2                            | 2,67                               | 0,0000                                     |
| Fga         | Fibrinogen alpha chain OS=Mus musculus OX=10090 GN=Fga PE=1 SV=1                                         | 2,53                               | 0,0000                                     |
| Pzp         | Pregnancy zone protein OS=Mus musculus OX=10090 GN=Pzp PE=1 SV=3                                         | 2,51                               | 0,0000                                     |
| Fgb         | Fibrinogen beta chain OS=Mus musculus OX=10090 GN=Fgb PE=1 SV=1                                          | 2,48                               | 0,0000                                     |
| Aif1        | Allograft inflammatory factor 1 OS=Mus musculus OX=10090 GN=Aif1 PE=1 SV=1                               | 2,33                               | 0,0000                                     |
| Cp          | Ceruloplasmin OS=Mus musculus OX=10090 GN=Cp PE=1 SV=2                                                   | 2,29                               | 0,0000                                     |
| Apoa1       | Apolipoprotein A-I OS=Mus musculus OX=10090 GN=Apoa1 PE=1 SV=2                                           | 2,29                               | 0,0000                                     |
| Glipr2      | Golgi-associated plant pathogenesis-related protein 1 OS=Mus musculus OX=10090 GN=Glipr2 PE=1 SV=3       | 2,29                               | 0,0000                                     |
| Itgam       | Integrin alpha-M OS=Mus musculus OX=10090 GN=Itgam PE=1 SV=2                                             | 2,21                               | 0,0000                                     |
| Mgst1       | Microsomal glutathione S-transferase 1 OS=Mus musculus OX=10090 GN=Mgst1 PE=1 SV=3                       | 2,17                               | 0,0000                                     |
| Ighg1       | Ig gamma-1 chain C region, membrane-bound form OS=Mus musculus OX=10090 GN=Ighg1 PE=1 SV=2               | 2,10                               | 0,0000                                     |
| Anxa2       | Annexin A2 OS=Mus musculus OX=10090 GN=Anxa2 PE=1 SV=2                                                   | 2,10                               | 0,0000                                     |
| Serpinh1    | Serpin H1 OS=Mus musculus OX=10090 GN=Serpinh1 PE=1 SV=3                                                 | 2,07                               | 0,0000                                     |
| Hrg         | Histidine-rich glycoprotein OS=Mus musculus OX=10090 GN=Hrg PE=1 SV=2                                    | 2,06                               | 0,0011                                     |
| C1qb        | Complement C1q subcomponent subunit B OS=Mus musculus OX=10090 GN=C1qb PE=1 SV=2                         | 2,02                               | 0,0000                                     |
| Tagln2      | Transgelin-2 OS=Mus musculus OX=10090 GN=Tagln2 PE=1 SV=4                                                | 2,01                               | 0,0000                                     |
| Kcnj10      | ATP-sensitive inward rectifier potassium channel 10 OS=Mus musculus OX=10090 GN=Kcnj10 PE=1 SV=1         | 1,99                               | 0,0000                                     |
| Slc14a1     | Urea transporter 1 OS=Mus musculus OX=10090 GN=Slc14a1 PE=1 SV=2                                         | 1,97                               | 0,0001                                     |
| Itgb2       | Integrin beta-2 OS=Mus musculus OX=10090 GN=Itgb2 PE=1 SV=2                                              | 1,91                               | 0,0001                                     |
| C1qa        | Complement C1q subcomponent subunit A OS=Mus musculus OX=10090 GN=C1qa PE=1 SV=2                         | 1,88                               | 0,0000                                     |
| Wfs1        | Wolframin OS=Mus musculus OX=10090 GN=Wfs1 PE=1 SV=1                                                     | 1,86                               | 0,0000                                     |
| Cd151       | CD151 antigen OS=Mus musculus OX=10090 GN=Cd151 PE=1 SV=2                                                | 1,85                               | 0,0007                                     |
| Stat1       | Signal transducer and activator of transcription 1 OS=Mus musculus OX=10090 GN=Stat1 PE=1 SV=1           | 1,85                               | 0,0005                                     |
| Lcp1        | Plastin-2 OS=Mus musculus OX=10090 GN=Lcp1 PE=1 SV=4                                                     | 1,81                               | 0,0003                                     |
| Serpina1d   | Alpha-1-antitrypsin 1-4 OS=Mus musculus OX=10090 GN=Serpina1d PE=1 SV=1                                  | 1,81                               | 0,0001                                     |
| Ide         | Insulin-degrading enzyme OS=Mus musculus OX=10090 GN=Ide PE=1 SV=1                                       | 1,78                               | 0,0004                                     |
| Mcam        | Cell surface glycoprotein MUC18 OS=Mus musculus OX=10090 GN=Mcam PE=1 SV=1                               | 1,77                               | 0,0044                                     |
| Nap115      | Nucleosome assembly protein 1-like 5 OS=Mus musculus OX=10090 GN=Nap115 PE=1 SV=1                        | 1,76                               | 0,0001                                     |
| Arhgdib     | Rho GDP-dissociation inhibitor 2 OS=Mus musculus OX=10090 GN=Arhgdib PE=1 SV=3                           | 1,76                               | 0,0020                                     |
| Clic1       | Chloride intracellular channel protein 1 OS=Mus musculus OX=10090 GN=Clic1 PE=1 SV=3                     | 1,76                               | 0,0003                                     |
| C1qc        | Complement C1q subcomponent subunit C OS=Mus musculus OX=10090 GN=C1qc PE=1 SV=2                         | 1,72                               | 0,0002                                     |
| Cfh         | Complement factor H OS=Mus musculus OX=10090 GN=Cfh PE=1 SV=2                                            | 1,66                               | 0,0061                                     |
| Itga6       | Integrin alpha-6 OS=Mus musculus OX=10090 GN=Itga6 PE=1 SV=3                                             | 1,65                               | 0,0022                                     |
| Ybx1        | Y-box-binding protein 1 OS=Mus musculus OX=10090 GN=Ybx1 PE=1 SV=3                                       | 1,64                               | 0,0006                                     |
| Fn1         | Fibronectin OS=Mus musculus OX=10090 GN=Fn1 PE=1 SV=4                                                    | 1,61                               | 0,0053                                     |
| Npl         | N-acetylneuraminidase OS=Mus musculus OX=10090 GN=Npl PE=1 SV=1                                          | 1,60                               | 0,0092                                     |
| Apod        | Apolipoprotein D OS=Mus musculus OX=10090 GN=Apod PE=1 SV=1                                              | 1,60                               | 0,0091                                     |
| Lactb2      | Endoribonuclease LACTB2 OS=Mus musculus OX=10090 GN=Lactb2 PE=1 SV=1                                     | 1,59                               | 0,0093                                     |
| Itgb3       | Integrin beta-3 OS=Mus musculus OX=10090 GN=Itgb3 PE=1 SV=2                                              | 1,59                               | 0,0020                                     |
| Stat3       | Signal transducer and activator of transcription 3 OS=Mus musculus OX=10090 GN=Stat3 PE=1 SV=2           | 1,57                               | 0,0235                                     |
| Clu         | Clusterin OS=Mus musculus OX=10090 GN=Clu PE=1 SV=1                                                      | 1,56                               | 0,0031                                     |
| Nptx2       | Neuronal pentraxin-2 OS=Mus musculus OX=10090 GN=Nptx2 PE=2 SV=1                                         | 1,56                               | 0,0021                                     |
| Flna        | Filamin-A OS=Mus musculus OX=10090 GN=Flna PE=1 SV=5                                                     | 1,56                               | 0,0073                                     |
| Arpc1b      | Actin-related protein 2/3 complex subunit 1B OS=Mus musculus OX=10090 GN=Arpc1b PE=1 SV=4                | 1,55                               | 0,0078                                     |
| Krt77       | Keratin, type II cytoskeletal 1b OS=Mus musculus OX=10090 GN=Krt77 PE=1 SV=1                             | 1,54                               | 0,0020                                     |
| Fcer1g      | High affinity immunoglobulin epsilon receptor subunit gamma OS=Mus musculus OX=10090 GN=Fcer1g PE=1 SV=1 | 1,54                               | 0,0106                                     |
| Crip2       | Cysteine-rich protein 2 OS=Mus musculus OX=10090 GN=Crip2 PE=1 SV=1                                      | 1,54                               | 0,0048                                     |
| Ttc38       | Tetratricopeptide repeat protein 38 OS=Mus musculus OX=10090 GN=Ttc38 PE=1 SV=2                          | 1,53                               | 0,0165                                     |

|                 |                                                                                                                                                |      |        |
|-----------------|------------------------------------------------------------------------------------------------------------------------------------------------|------|--------|
| <b>Ddrgrk1</b>  | DDR GK domain-containing protein 1 OS=Mus musculus OX=10090 GN=Ddrgrk1 PE=1 SV=2                                                               | 1,53 | 0,0182 |
| <b>Psmg2</b>    | Proteasome assembly chaperone 2 OS=Mus musculus OX=10090 GN=Psmg2 PE=1 SV=1                                                                    | 1,52 | 0,0031 |
| <b>Fhit</b>     | Bis(5'-adenosyl)-triphosphatase OS=Mus musculus OX=10090 GN=Fhit PE=1 SV=3                                                                     | 1,51 | 0,0213 |
| <b>Ighm</b>     | Immunoglobulin heavy constant mu OS=Mus musculus OX=10090 GN=Ighm PE=1 SV=2                                                                    | 1,51 | 0,0066 |
| <b>Gjb6</b>     | Gap junction beta-6 protein OS=Mus musculus OX=10090 GN=Gjb6 PE=1 SV=1                                                                         | 1,51 | 0,0154 |
| <b>Acot1</b>    | Acyl-coenzyme A thioesterase 1 OS=Mus musculus OX=10090 GN=Acot1 PE=1 SV=1                                                                     | 1,50 | 0,0111 |
| <b>Scg3</b>     | Secretogranin-3 OS=Mus musculus OX=10090 GN=Scg3 PE=1 SV=1                                                                                     | 1,50 | 0,0058 |
| <b>Crot</b>     | Peroxisomal carnitine O-octanoyltransferase OS=Mus musculus OX=10090 GN=Crot PE=1 SV=1                                                         | 1,49 | 0,0203 |
| <b>S100a13</b>  | Protein S100-A13 OS=Mus musculus OX=10090 GN=S100a13 PE=1 SV=1                                                                                 | 1,49 | 0,0055 |
| <b>Sema4a</b>   | Semaphorin-4A OS=Mus musculus OX=10090 GN=Sema4a PE=1 SV=2                                                                                     | 1,48 | 0,0073 |
| <b>Plxdc2</b>   | Plexin domain-containing protein 2 OS=Mus musculus OX=10090 GN=Plxdc2 PE=1 SV=1                                                                | 1,48 | 0,0267 |
| <b>Gltp</b>     | Glycolipid transfer protein OS=Mus musculus OX=10090 GN=Gltp PE=1 SV=3                                                                         | 1,47 | 0,0112 |
| <b>Lsm6</b>     | U6 snRNA-associated Sm-like protein LSm6 OS=Mus musculus OX=10090 GN=Lsm6 PE=1 SV=1                                                            | 1,47 | 0,0154 |
| <b>Anpep</b>    | Aminopeptidase N OS=Mus musculus OX=10090 GN=Anpep PE=1 SV=4                                                                                   | 1,47 | 0,0217 |
| <b>Tgm2</b>     | Protein-glutamine gamma-glutamyltransferase 2 OS=Mus musculus OX=10090 GN=Tgm2 PE=1 SV=4                                                       | 1,47 | 0,0099 |
| <b>Lgmn</b>     | Legumain OS=Mus musculus OX=10090 GN=Lgmn PE=1 SV=1                                                                                            | 1,47 | 0,0076 |
| <b>Ppp1r1b</b>  | Protein phosphatase 1 regulatory subunit 1B OS=Mus musculus OX=10090 GN=Ppp1r1b PE=1 SV=2                                                      | 1,46 | 0,0053 |
| <b>Ca14</b>     | Carbonic anhydrase 14 OS=Mus musculus OX=10090 GN=Ca14 PE=1 SV=1                                                                               | 1,46 | 0,0239 |
| <b>Ppp1r1a</b>  | Protein phosphatase 1 regulatory subunit 1A OS=Mus musculus OX=10090 GN=Ppp1r1a PE=1 SV=1                                                      | 1,45 | 0,0294 |
| <b>Krt76</b>    | Keratin, type II cytoskeletal 2 oral OS=Mus musculus OX=10090 GN=Krt76 PE=1 SV=1                                                               | 1,45 | 0,0137 |
| <b>Anxa3</b>    | Annexin A3 OS=Mus musculus OX=10090 GN=Anxa3 PE=1 SV=4                                                                                         | 1,44 | 0,0095 |
| <b>Ampd3</b>    | AMP deaminase 3 OS=Mus musculus OX=10090 GN=Ampd3 PE=1 SV=2                                                                                    | 1,44 | 0,0309 |
| <b>Commd1</b>   | COMM domain-containing protein 1 OS=Mus musculus OX=10090 GN=Commd1 PE=1 SV=2                                                                  | 1,44 | 0,0212 |
| <b>Lamp1</b>    | Lysosome-associated membrane glycoprotein 1 OS=Mus musculus OX=10090 GN=Lamp1 PE=1 SV=2                                                        | 1,44 | 0,0229 |
| <b>Plp2</b>     | Proteolipid protein 2 OS=Mus musculus OX=10090 GN=Plp2 PE=1 SV=1                                                                               | 1,44 | 0,0308 |
| <b>S100a16</b>  | Protein S100-A16 OS=Mus musculus OX=10090 GN=S100a16 PE=1 SV=1                                                                                 | 1,43 | 0,0131 |
| <b>Lasp1</b>    | LIM and SH3 domain protein 1 OS=Mus musculus OX=10090 GN=Lasp1 PE=1 SV=1                                                                       | 1,43 | 0,0104 |
| <b>Nucb1</b>    | Nucleobindin-1 OS=Mus musculus OX=10090 GN=Nucb1 PE=1 SV=2                                                                                     | 1,43 | 0,0379 |
| <b>Scn3b</b>    | Sodium channel subunit beta-3 OS=Mus musculus OX=10090 GN=Scn3b PE=1 SV=1                                                                      | 1,42 | 0,0348 |
| <b>Ccdc90b</b>  | Coiled-coil domain-containing protein 90B, mitochondrial OS=Mus musculus OX=10090 GN=Ccdc90b PE=1 SV=1                                         | 1,42 | 0,0344 |
| <b>Ncstn</b>    | Nicastrin OS=Mus musculus OX=10090 GN=Ncstn PE=1 SV=3                                                                                          | 1,42 | 0,0200 |
| <b>Txndc5</b>   | Thioredoxin domain-containing protein 5 OS=Mus musculus OX=10090 GN=Txndc5 PE=1 SV=2                                                           | 1,42 | 0,0375 |
| <b>Selenow</b>  | Selenoprotein W OS=Mus musculus OX=10090 GN=Selenow PE=1 SV=3                                                                                  | 1,41 | 0,0425 |
| <b>Ier3ip1</b>  | Immediate early response 3-interacting protein 1 OS=Mus musculus OX=10090 GN=Ier3ip1 PE=3 SV=1                                                 | 1,41 | 0,0382 |
| <b>Cst3</b>     | Cystatin-C OS=Mus musculus OX=10090 GN=Cst3 PE=1 SV=2                                                                                          | 1,41 | 0,0262 |
| <b>Hba</b>      | Hemoglobin subunit alpha OS=Mus musculus OX=10090 GN=Hba PE=1 SV=2                                                                             | 1,41 | 0,0217 |
| <b>Mvd</b>      | Diphosphomevalonate decarboxylase OS=Mus musculus OX=10090 GN=Mvd PE=1 SV=2                                                                    | 1,41 | 0,0494 |
| <b>Scg2</b>     | Secretogranin-2 OS=Mus musculus OX=10090 GN=Scg2 PE=1 SV=1                                                                                     | 1,41 | 0,0455 |
| <b>Lamp2</b>    | Lysosome-associated membrane glycoprotein 2 OS=Mus musculus OX=10090 GN=Lamp2 PE=1 SV=2                                                        | 1,41 | 0,0271 |
| <b>Ctsb</b>     | Cathepsin B OS=Mus musculus OX=10090 GN=Ctsb PE=1 SV=2                                                                                         | 1,41 | 0,0264 |
| <b>Itgb1</b>    | Integrin beta-1 OS=Mus musculus OX=10090 GN=Itgb1 PE=1 SV=1                                                                                    | 1,41 | 0,0142 |
| <b>Rbp1</b>     | Retinol-binding protein 1 OS=Mus musculus OX=10090 GN=Rbp1 PE=1 SV=2                                                                           | 1,41 | 0,0283 |
| <b>Gsn</b>      | Gelsolin OS=Mus musculus OX=10090 GN=Gsn PE=1 SV=3                                                                                             | 1,41 | 0,0276 |
| <b>Ctsd</b>     | Cathepsin D OS=Mus musculus OX=10090 GN=Ctsd PE=1 SV=1                                                                                         | 1,41 | 0,0237 |
| <b>Ctsa</b>     | Lysosomal protective protein OS=Mus musculus OX=10090 GN=Ctsa PE=1 SV=1                                                                        | 1,40 | 0,0154 |
| <b>Gba</b>      | Lysosomal acid glucosylceramidase OS=Mus musculus OX=10090 GN=Gba PE=1 SV=1                                                                    | 1,40 | 0,0472 |
| <b>Hexb</b>     | Beta-hexosaminidase subunit beta OS=Mus musculus OX=10090 GN=Hexb PE=1 SV=2                                                                    | 1,40 | 0,0275 |
| <b>Cpe</b>      | Carboxypeptidase E OS=Mus musculus OX=10090 GN=Cpe PE=1 SV=2                                                                                   | 1,40 | 0,0188 |
| <b>Scarb2</b>   | Lysosome membrane protein 2 OS=Mus musculus OX=10090 GN=Scarb2 PE=1 SV=3                                                                       | 1,40 | 0,0107 |
| <b>Stx12</b>    | Syntaxin-12 OS=Mus musculus OX=10090 GN=Stx12 PE=1 SV=1                                                                                        | 1,39 | 0,0428 |
| <b>Nptxr</b>    | Neuronal pentraxin receptor OS=Mus musculus OX=10090 GN=Nptxr PE=1 SV=1                                                                        | 1,39 | 0,0447 |
| <b>Psme1</b>    | Proteasome activator complex subunit 1 OS=Mus musculus OX=10090 GN=Psme1 PE=1 SV=2                                                             | 1,39 | 0,0303 |
| <b>Tspan2</b>   | Tetraspanin-2 OS=Mus musculus OX=10090 GN=Tspan2 PE=1 SV=1                                                                                     | 1,39 | 0,0275 |
| <b>Nes</b>      | Nestin OS=Mus musculus OX=10090 GN=Nes PE=1 SV=1                                                                                               | 1,38 | 0,0332 |
| <b>Krt1</b>     | Keratin, type II cytoskeletal 1 OS=Mus musculus OX=10090 GN=Krt1 PE=1 SV=4                                                                     | 1,38 | 0,0331 |
| <b>Pdcd5</b>    | Programmed cell death protein 5 OS=Mus musculus OX=10090 GN=Pdcd5 PE=1 SV=3                                                                    | 1,38 | 0,0383 |
| <b>P4hb</b>     | Protein disulfide-isomerase OS=Mus musculus OX=10090 GN=P4hb PE=1 SV=2                                                                         | 1,38 | 0,0390 |
| <b>Irs2</b>     | Insulin receptor substrate 2 OS=Mus musculus OX=10090 GN=Irs2 PE=1 SV=2                                                                        | 1,37 | 0,0366 |
| <b>Irgm1</b>    | Immunity-related GTPase family M protein 1 OS=Mus musculus OX=10090 GN=Irgm1 PE=1 SV=1                                                         | 1,37 | 0,0451 |
| <b>Krt72</b>    | Keratin, type II cytoskeletal 72 OS=Mus musculus OX=10090 GN=Krt72 PE=3 SV=1                                                                   | 1,37 | 0,0424 |
| <b>Tmem43</b>   | Transmembrane protein 43 OS=Mus musculus OX=10090 GN=Tmem43 PE=1 SV=1                                                                          | 1,36 | 0,0471 |
| <b>Tpm4</b>     | Tropomyosin alpha-4 chain OS=Mus musculus OX=10090 GN=Tpm4 PE=1 SV=3                                                                           | 1,36 | 0,0421 |
| <b>Gaa</b>      | Lysosomal alpha-glucosidase OS=Mus musculus OX=10090 GN=Gaa PE=1 SV=2                                                                          | 1,35 | 0,0353 |
| <b>Tbl2</b>     | Transducin beta-like protein 2 OS=Mus musculus OX=10090 GN=Tbl2 PE=1 SV=2                                                                      | 1,35 | 0,0414 |
| <b>Marcks1</b>  | MARCKS-related protein OS=Mus musculus OX=10090 GN=Marcks1 PE=1 SV=2                                                                           | 1,34 | 0,0344 |
| <b>Tpm1</b>     | Tropomyosin alpha-1 chain OS=Mus musculus OX=10090 GN=Tpm1 PE=1 SV=1                                                                           | 1,34 | 0,0429 |
| <b>Gss</b>      | Glutathione synthetase OS=Mus musculus OX=10090 GN=Gss PE=1 SV=1                                                                               | 1,33 | 0,0354 |
| <b>Mlec</b>     | Malectin OS=Mus musculus OX=10090 GN=Mlec PE=1 SV=2                                                                                            | 1,33 | 0,0429 |
| <b>Serp1b1a</b> | Leukocyte elastase inhibitor A OS=Mus musculus OX=10090 GN=Serp1b1a PE=1 SV=1                                                                  | 1,32 | 0,0465 |
| <b>Lingo2</b>   | Leucine-rich repeat and immunoglobulin-like domain-containing nogo receptor-interacting protein 2 OS=Mus musculus OX=10090 GN=Lingo2 PE=2 SV=1 | 1,31 | 0,0482 |
| <b>Prka</b>     | Protein kinase C alpha type OS=Mus musculus OX=10090 GN=Prka PE=1 SV=3                                                                         | 0,78 | 0,0409 |
| <b>Fbxo41</b>   | F-box only protein 41 OS=Mus musculus OX=10090 GN=Fbxo41 PE=1 SV=3                                                                             | 0,77 | 0,0467 |
| <b>Crocc</b>    | Rootletin OS=Mus musculus OX=10090 GN=Crocc PE=1 SV=2                                                                                          | 0,77 | 0,0489 |
| <b>Grin1</b>    | Glutamate receptor ionotropic, NMDA 1 OS=Mus musculus OX=10090 GN=Grin1 PE=1 SV=1                                                              | 0,77 | 0,0421 |

|                 |                                                                                                                  |      |        |
|-----------------|------------------------------------------------------------------------------------------------------------------|------|--------|
| <b>Erc2</b>     | ERC protein 2 OS=Mus musculus OX=10090 GN=Erc2 PE=1 SV=2                                                         | 0,77 | 0,0436 |
| <b>Grin2b</b>   | Glutamate receptor ionotropic, NMDA 2B OS=Mus musculus OX=10090 GN=Grin2b PE=1 SV=3                              | 0,76 | 0,0335 |
| <b>Dlgap2</b>   | Disks large-associated protein 2 OS=Mus musculus OX=10090 GN=Dlgap2 PE=1 SV=2                                    | 0,76 | 0,0323 |
| <b>Kcnj9</b>    | G protein-activated inward rectifier potassium channel 3 OS=Mus musculus OX=10090 GN=Kcnj9 PE=1 SV=2             | 0,75 | 0,0334 |
| <b>Iqsec2</b>   | IQ motif and SEC7 domain-containing protein 2 OS=Mus musculus OX=10090 GN=Iqsec2 PE=1 SV=3                       | 0,74 | 0,0345 |
| <b>Dlg4</b>     | Disks large homolog 4 OS=Mus musculus OX=10090 GN=Dlg4 PE=1 SV=1                                                 | 0,74 | 0,0171 |
| <b>Anks1b</b>   | Ankyrin repeat and sterile alpha motif domain-containing protein 1B OS=Mus musculus OX=10090 GN=Anks1b PE=1 SV=3 | 0,73 | 0,0148 |
| <b>Slc25a31</b> | ADP/ATP translocase 4 OS=Mus musculus OX=10090 GN=Slc25a31 PE=1 SV=1                                             | 0,73 | 0,0423 |
| <b>Osbpl6</b>   | Oxysterol-binding protein-related protein 6 OS=Mus musculus OX=10090 GN=Osbpl6 PE=1 SV=1                         | 0,72 | 0,0463 |
| <b>Cln4</b>     | H(+)/Cl(-) exchange transporter 4 OS=Mus musculus OX=10090 GN=Cln4 PE=2 SV=2                                     | 0,72 | 0,0423 |
| <b>Acot11</b>   | Acyl-coenzyme A thioesterase 11 OS=Mus musculus OX=10090 GN=Acot11 PE=1 SV=1                                     | 0,72 | 0,0330 |
| <b>Kcnd2</b>    | Potassium voltage-gated channel subfamily D member 2 OS=Mus musculus OX=10090 GN=Kcnd2 PE=1 SV=1                 | 0,72 | 0,0448 |
| <b>F13a1</b>    | Coagulation factor XIII A chain OS=Mus musculus OX=10090 GN=F13a1 PE=1 SV=3                                      | 0,71 | 0,0282 |
| <b>Gsg1l</b>    | Germ cell-specific gene 1-like protein OS=Mus musculus OX=10090 GN=Gsg1l PE=1 SV=2                               | 0,71 | 0,0360 |
| <b>Mif2</b>     | Myeloid leukemia factor 2 OS=Mus musculus OX=10090 GN=Mif2 PE=1 SV=1                                             | 0,70 | 0,0092 |
|                 | LysM and putative peptidoglycan-binding domain-containing protein 2 OS=Mus musculus OX=10090 GN=Lysmd2 PE=1 SV=2 |      |        |
| <b>Lysmd2</b>   |                                                                                                                  | 0,68 | 0,0156 |
| <b>Smarca4</b>  | Transcription activator BRG1 OS=Mus musculus OX=10090 GN=Smarca4 PE=1 SV=1                                       | 0,68 | 0,0183 |
| <b>Prodh</b>    | Proline dehydrogenase 1, mitochondrial OS=Mus musculus OX=10090 GN=Prodh PE=1 SV=2                               | 0,65 | 0,0093 |
| <b>Cbln2</b>    | Cerebellin-2 OS=Mus musculus OX=10090 GN=Cbln2 PE=1 SV=1                                                         | 0,64 | 0,0477 |
| <b>Chd5</b>     | Chromodomain-helicase-DNA-binding protein 5 OS=Mus musculus OX=10090 GN=Chd5 PE=1 SV=1                           | 0,63 | 0,0322 |
| <b>Gatad2b</b>  | Transcriptional repressor p66-beta OS=Mus musculus OX=10090 GN=Gatad2b PE=1 SV=1                                 | 0,63 | 0,0322 |
| <b>Pkn1</b>     | Serine/threonine-protein kinase N1 OS=Mus musculus OX=10090 GN=Pkn1 PE=1 SV=3                                    | 0,62 | 0,0264 |
| <b>Rbfox1</b>   | RNA binding protein fox-1 homolog 1 OS=Mus musculus OX=10090 GN=Rbfox1 PE=1 SV=3                                 | 0,61 | 0,0020 |
| <b>Tmem186</b>  | Transmembrane protein 186 OS=Mus musculus OX=10090 GN=Tmem186 PE=1 SV=2                                          | 0,59 | 0,0196 |
| <b>Ube2h</b>    | Ubiquitin-conjugating enzyme E2 H OS=Mus musculus OX=10090 GN=Ube2h PE=1 SV=1                                    | 0,56 | 0,0017 |
| <b>Slc25a44</b> | Solute carrier family 25 member 44 OS=Mus musculus OX=10090 GN=Slc25a44 PE=1 SV=1                                | 0,56 | 0,0021 |
| <b>Cldn10</b>   | Claudin-10 OS=Mus musculus OX=10090 GN=Cldn10 PE=1 SV=2                                                          | 0,52 | 0,0005 |
| <b>Spata2l</b>  | Spermatogenesis-associated protein 2-like protein OS=Mus musculus OX=10090 GN=Spata2l PE=1 SV=1                  | 0,50 | 0,0001 |
| <b>Dnajb3</b>   | DnaJ homolog subfamily B member 3 OS=Mus musculus OX=10090 GN=Dnajb3 PE=2 SV=1                                   | 0,34 | 0,0000 |
| <b>Nr2f1</b>    | COUP transcription factor 1 OS=Mus musculus OX=10090 GN=Nr2f1 PE=2 SV=2                                          | 0,10 | 0,0000 |
| <b>Polr2c</b>   | DNA-directed RNA polymerase II subunit RPB3 OS=Mus musculus OX=10090 GN=Polr2c PE=1 SV=2                         | 0,01 | 0,0000 |
| <b>Smyd3</b>    | Histone-lysine N-methyltransferase SMYD3 OS=Mus musculus OX=10090 GN=Smyd3 PE=2 SV=1                             | 0,01 | 0,0000 |

178 elements included exclusively in injury vs. Control

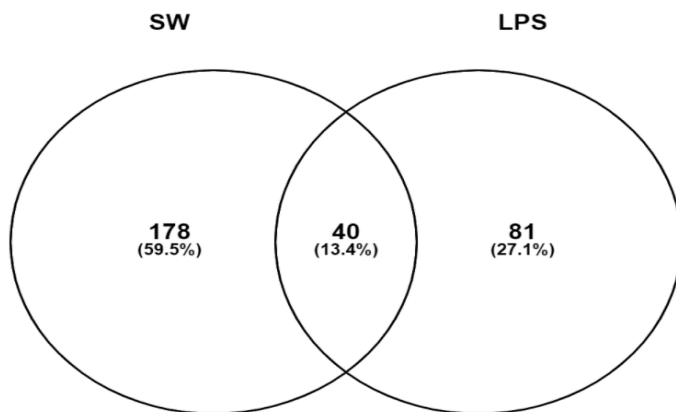

Supplement: Supplementary file [file media-8.pdf]
