# Supplementary material for: Brain injury environment critically influences the connectivity of transplanted neurons
Source: bioRxiv preprint, doi:10.1101/2021.12.13.472270, version 1 (2021-12-14)
Supplement: Supplementary Data S1 - Connectivity analysis [file 472270_file05.pdf]

Connectivity analysis. Absolute number of counted starter neurons (GFP/RFP) and pre-synaptic neurons (GFP)

|         |   | starter | pre-synaptic |      |     |      |       |     |     |     |     |    |    |    |      |    |    |    |     |     |      |    |     |     |      |    |     |     |     | contralateral |      |     |    |    |     |     |    |    |     |     |     |     |   |   |
|---------|---|---------|--------------|------|-----|------|-------|-----|-----|-----|-----|----|----|----|------|----|----|----|-----|-----|------|----|-----|-----|------|----|-----|-----|-----|---------------|------|-----|----|----|-----|-----|----|----|-----|-----|-----|-----|---|---|
|         |   |         | ipsilateral  |      |     |      |       |     |     |     |     |    |    |    |      |    |    |    |     |     |      |    |     |     |      |    |     |     |     |               |      |     |    |    |     |     |    |    |     |     |     |     |   |   |
| mouse   |   |         | Vis          | Thal | LGN | Thal | other | Aud | Tea | ENT | ECT | GP | MO | Cg | PIPa | SS | RS | Ph | HDB | Orb | POST | SI | AMY | CLA | Pons | MB | HLZ | HPF | Vis | SS            | PIPa | LHA | MO | Cg | ECT | Tea | RS | Ph | HDB | Aud | Orb | ENT |   |   |
| SW 1mo  | 1 | 1       | 7            | 0    | 0   | 0    | 0     | 0   | 0   | 0   | 1   | 0  | 0  | 0  | 0    | 0  | 0  | 0  | 0   | 0   | 0    | 0  | 0   | 0   | 0    | 0  | 0   | 0   | 0   | 0             | 0    | 0   | 0  | 0  | 0   | 0   | 0  | 0  | 0   | 0   | 0   | 0   | 0 |   |
|         | 2 | 9       | 502          | 40   | 2   | 8    | 2     | 6   | 21  | 0   | 3   | 0  | 3  | 0  | 5    | 1  | 11 | 0  | 2   | 1   | 0    | 0  | 0   | 0   | 0    | 0  | 0   | 0   | 0   | 5             | 0    | 0   | 0  | 0  | 0   | 0   | 0  | 0  | 0   | 0   | 0   | 0   | 0 | 0 |
|         | 3 | 40      | 990          | 57   | 11  | 4    | 4     | 2   | 17  | 2   | 7   | 0  | 8  | 5  | 50   | 1  | 5  | 1  | 0   | 2   | 0    | 0  | 0   | 0   | 0    | 0  | 0   | 0   | 48  | 0             | 4    | 0   | 0  | 0  | 0   | 0   | 0  | 0  | 1   | 0   | 1   | 0   | 0 | 0 |
|         | 4 | 93      | 3257         | 157  | 75  | 18   | 7     | 2   | 16  | 3   | 4   | 0  | 22 | 14 | 53   | 0  | 6  | 6  | 0   | 1   | 0    | 0  | 1   | 0   | 0    | 1  | 0   | 9   | 0   | 1             | 2    | 0   | 0  | 0  | 0   | 0   | 0  | 0  | 0   | 0   | 0   | 0   | 0 | 0 |
| SW 3mo  | 1 | 1       | 5            | 1    | 0   | 0    | 0     | 0   | 0   | 0   | 0   | 0  | 0  | 0  | 0    | 0  | 2  | 0  | 0   | 0   | 0    | 0  | 0   | 0   | 0    | 0  | 0   | 0   | 0   | 0             | 0    | 0   | 0  | 0  | 0   | 0   | 0  | 0  | 0   | 0   | 0   | 0   | 0 | 0 |
|         | 2 | 1       | 7            | 0    | 0   | 0    | 0     | 0   | 0   | 0   | 0   | 0  | 0  | 0  | 0    | 0  | 0  | 0  | 0   | 0   | 0    | 0  | 0   | 0   | 0    | 0  | 0   | 0   | 0   | 0             | 0    | 0   | 0  | 0  | 0   | 0   | 0  | 0  | 0   | 0   | 0   | 0   | 0 |   |
|         | 3 | 14      | 247          | 8    | 0   | 1    | 3     | 1   | 2   | 0   | 0   | 0  | 0  | 0  | 1    | 1  | 0  | 0  | 0   | 0   | 0    | 0  | 0   | 0   | 0    | 0  | 0   | 0   | 0   | 0             | 0    | 0   | 0  | 0  | 0   | 0   | 0  | 0  | 0   | 0   | 0   | 0   | 0 |   |
|         | 4 | 16      | 263          | 16   | 6   | 0    | 0     | 2   | 4   | 0   | 0   | 0  | 0  | 0  | 0    | 0  | 6  | 1  | 2   | 0   | 0    | 0  | 0   | 0   | 0    | 0  | 0   | 0   | 0   | 0             | 0    | 0   | 0  | 0  | 0   | 0   | 0  | 0  | 0   | 0   | 0   | 0   | 0 |   |
| INTACT  | 5 | 4       | 31           | 8    | 1   | 0    | 0     | 0   | 0   | 0   | 0   | 0  | 0  | 0  | 0    | 0  | 1  | 0  | 0   | 0   | 0    | 0  | 0   | 0   | 0    | 0  | 0   | 0   | 0   | 0             | 0    | 0   | 0  | 0  | 0   | 0   | 0  | 0  | 0   | 0   | 0   | 0   | 0 | 0 |
|         | 6 | 9       | 103          | 1    | 0   | 0    | 0     | 0   | 1   | 4   | 0   | 0  | 0  | 0  | 0    | 1  | 4  | 0  | 0   | 0   | 0    | 0  | 1   | 0   | 0    | 0  | 0   | 0   | 1   | 0             | 0    | 0   | 0  | 0  | 0   | 0   | 0  | 0  | 0   | 0   | 0   | 0   | 0 | 0 |
|         | 1 | 39      | 208          | 16   | 4   | 1    | 1     | 0   | 4   | 0   | 0   | 0  | 0  | 2  | 1    | 5  | 0  | 2  | 0   | 0   | 0    | 0  | 0   | 0   | 0    | 0  | 0   | 2   | 1   | 3             | 0    | 0   | 0  | 0  | 0   | 0   | 0  | 0  | 0   | 0   | 0   | 0   | 0 | 0 |
|         | 2 | 22      | 155          | 7    | 2   | 0    | 0     | 0   | 0   | 0   | 0   | 0  | 1  | 0  | 0    | 0  | 15 | 0  | 0   | 0   | 0    | 0  | 0   | 1   | 0    | 0  | 0   | 0   | 0   | 0             | 0    | 0   | 0  | 0  | 0   | 0   | 0  | 0  | 0   | 0   | 0   | 0   | 0 | 0 |
| LPS 1mo | 3 | 1       | 1            | 0    | 1   | 0    | 0     | 0   | 0   | 0   | 0   | 0  | 0  | 0  | 0    | 0  | 0  | 0  | 0   | 0   | 0    | 0  | 0   | 0   | 0    | 0  | 0   | 0   | 0   | 0             | 0    | 0   | 0  | 0  | 0   | 0   | 0  | 0  | 0   | 0   | 0   | 0   | 0 | 0 |
|         | 4 | 90      | 105          | 1    | 3   | 0    | 1     | 0   | 0   | 0   | 0   | 0  | 0  | 0  | 0    | 0  | 3  | 0  | 0   | 0   | 0    | 0  | 0   | 0   | 0    | 0  | 0   | 0   | 0   | 0             | 0    | 0   | 0  | 0  | 0   | 0   | 0  | 0  | 0   | 0   | 0   | 0   | 0 | 0 |
|         | 5 | 4       | 20           | 0    | 0   | 0    | 0     | 0   | 0   | 0   | 0   | 0  | 0  | 0  | 0    | 0  | 0  | 0  | 0   | 0   | 0    | 0  | 0   | 0   | 0    | 0  | 0   | 0   | 0   | 0             | 0    | 0   | 0  | 0  | 0   | 0   | 0  | 0  | 0   | 0   | 0   | 0   | 0 | 0 |
|         | 1 | 1       | 8            | 0    | 0   | 0    | 0     | 0   | 0   | 0   | 0   | 0  | 0  | 0  | 0    | 0  | 0  | 0  | 0   | 0   | 0    | 0  | 0   | 0   | 0    | 0  | 0   | 0   | 0   | 0             | 0    | 0   | 0  | 0  | 0   | 0   | 0  | 0  | 0   | 0   | 0   | 0   | 0 | 0 |
|         | 2 | 2       | 13           | 0    | 0   | 0    | 0     | 0   | 0   | 0   | 0   | 0  | 0  | 0  | 0    | 0  | 1  | 0  | 0   | 0   | 0    | 0  | 0   | 0   | 0    | 0  | 0   | 0   | 0   | 0             | 0    | 0   | 0  | 0  | 0   | 0   | 0  | 0  | 0   | 0   | 0   | 0   | 0 | 0 |
|         | 3 | 1       | 6            | 0    | 0   | 0    | 0     | 0   | 0   | 0   | 0   | 0  | 0  | 0  | 0    | 0  | 0  | 0  | 0   | 0   | 0    | 0  | 0   | 0   | 0    | 0  | 0   | 0   | 0   | 0             | 0    | 0   | 0  | 0  | 0   | 0   | 0  | 0  | 0   | 0   | 0   | 0   | 0 |   |
|         | 4 | 1       | 6            | 0    | 0   | 0    | 0     | 0   | 0   | 0   | 0   | 0  | 0  | 0  | 0    | 0  | 0  | 0  | 0   | 0   | 0    | 0  | 0   | 0   | 0    | 0  | 0   | 0   | 0   | 0             | 0    | 0   | 0  | 0  | 0   | 0   | 0  | 0  | 0   | 0   | 0   | 0   | 0 |   |
|         | 5 | 45      | 301          | 25   | 10  | 1    | 1     | 0   | 0   | 0   | 1   | 0  | 0  | 3  | 0    | 8  | 0  | 6  | 0   | 0   | 1    | 1  | 0   | 0   | 0    | 0  | 4   | 0   | 0   | 0             | 0    | 0   | 0  | 0  | 0   | 0   | 0  | 0  | 1   | 0   | 0   | 0   | 0 | 0 |
