# Supplementary material for: Brain injury environment critically influences the connectivity of transplanted neurons
Source: bioRxiv or medRxiv preprint supplement (doi:10.1101/2021.12.13.472270), 2021-12-14
Supplement: Supplementary file [file media-4.pdf]

| Protein FDR Confidence: Combined | Accession | # Unique Peptides | Gene symbol      | Description                                                                                         | Abundance Ratio: (ipsi) / (intact) | Abundance Ratio P-Value: (ipsi) / (intact) |
|----------------------------------|-----------|-------------------|------------------|-----------------------------------------------------------------------------------------------------|------------------------------------|--------------------------------------------|
| High                             | P01029    | 6                 | <b>C4b</b>       | Complement C4-B OS=Mus musculus OX=10090 GN=C4b PE=1 SV=3                                           | 100,00                             | 0,0000                                     |
| High                             | P32261    | 15                | <b>Serpinc1</b>  | Antithrombin-III OS=Mus musculus OX=10090 GN=Serpinc1 PE=1 SV=1                                     | 12,07                              | 0,0000                                     |
| High                             | P01867    | 3                 | <b>Igh-3</b>     | Ig gamma-2B chain C region OS=Mus musculus OX=10090 GN=Igh-3 PE=1 SV=3                              | 10,82                              | 0,0000                                     |
| High                             | P07309    | 2                 | <b>Ttr</b>       | Transthyretin OS=Mus musculus OX=10090 GN=Ttr PE=1 SV=1                                             | 9,62                               | 0,0000                                     |
| High                             | P03995    | 26                | <b>Gfap</b>      | Glial fibrillary acidic protein OS=Mus musculus OX=10090 GN=Gfap PE=1 SV=4                          | 7,65                               | 0,0000                                     |
| High                             | Q00898    | 6                 | <b>Serpina1e</b> | Alpha-1-antitrypsin 1-5 OS=Mus musculus OX=10090 GN=Serpina1e PE=1 SV=1                             | 6,96                               | 0,0000                                     |
| High                             | Q61703    | 11                | <b>Itih2</b>     | Inter-alpha-trypsin inhibitor heavy chain H2 OS=Mus musculus OX=10090 GN=Itih2 PE=1 SV=1            | 6,92                               | 0,0000                                     |
| High                             | P01837    | 3                 | <b>Igkc</b>      | Immunoglobulin kappa constant OS=Mus musculus OX=10090 GN=Igkc PE=1 SV=2                            | 6,28                               | 0,0000                                     |
| High                             | P20918    | 18                | <b>Plg</b>       | Plasminogen OS=Mus musculus OX=10090 GN=Plg PE=1 SV=3                                               | 6,07                               | 0,0000                                     |
| High                             | P07724    | 43                | <b>Alb</b>       | Serum albumin OS=Mus musculus OX=10090 GN=Alb PE=1 SV=3                                             | 5,80                               | 0,0000                                     |
| High                             | P07758    | 4                 | <b>Serpina1a</b> | Alpha-1-antitrypsin 1-1 OS=Mus musculus OX=10090 GN=Serpina1a PE=1 SV=4                             | 5,79                               | 0,0000                                     |
| High                             | P01864    | 3                 |                  | Ig gamma-2A chain C region secreted form OS=Mus musculus OX=10090 PE=1 SV=1                         | 5,72                               | 0,0000                                     |
| High                             | P29699    | 7                 | <b>Ahsg</b>      | Alpha-2-HS-glycoprotein OS=Mus musculus OX=10090 GN=Ahsg PE=1 SV=1                                  | 5,29                               | 0,0000                                     |
| High                             | P23953    | 14                | <b>Ces1c</b>     | Carboxylesterase 1C OS=Mus musculus OX=10090 GN=Ces1c PE=1 SV=4                                     | 5,28                               | 0,0000                                     |
| High                             | Q9JLF6    | 8                 | <b>Tgm1</b>      | Protein-glutamine gamma-glutamyltransferase K OS=Mus musculus OX=10090 GN=Tgm1 PE=1 SV=2            | 5,15                               | 0,0000                                     |
| High                             | Q91X72    | 20                | <b>Hpx</b>       | Hemopexin OS=Mus musculus OX=10090 GN=Hpx PE=1 SV=2                                                 | 5,10                               | 0,0000                                     |
| Medium                           | Q06770    | 2                 | <b>Serpina6</b>  | Corticosteroid-binding globulin OS=Mus musculus OX=10090 GN=Serpina6 PE=1 SV=1                      | 5,09                               | 0,0000                                     |
| High                             | O08677    | 11                | <b>Kng1</b>      | Kininogen-1 OS=Mus musculus OX=10090 GN=Kng1 PE=1 SV=1                                              | 4,84                               | 0,0000                                     |
| High                             | P21614    | 16                | <b>Gc</b>        | Vitamin D-binding protein OS=Mus musculus OX=10090 GN=Gc PE=1 SV=2                                  | 4,74                               | 0,0000                                     |
| High                             | P22599    | 4                 | <b>Serpina1b</b> | Alpha-1-antitrypsin 1-2 OS=Mus musculus OX=10090 GN=Serpina1b PE=1 SV=2                             | 4,59                               | 0,0000                                     |
| High                             | Q01339    | 10                | <b>Apoh</b>      | Beta-2-glycoprotein 1 OS=Mus musculus OX=10090 GN=Apoh PE=1 SV=1                                    | 3,99                               | 0,0000                                     |
| High                             | P29788    | 4                 | <b>Vtn</b>       | Vitronectin OS=Mus musculus OX=10090 GN=Vtn PE=1 SV=2                                               | 3,88                               | 0,0000                                     |
| High                             | Q9R0H5    | 1                 | <b>Krt71</b>     | Keratin, type II cytoskeletal 71 OS=Mus musculus OX=10090 GN=Krt71 PE=1 SV=1                        | 3,71                               | 0,0000                                     |
| High                             | P01027    | 43                | <b>C3</b>        | Complement C3 OS=Mus musculus OX=10090 GN=C3 PE=1 SV=3                                              | 3,58                               | 0,0000                                     |
| High                             | P07759    | 12                | <b>Serpina3k</b> | Serine protease inhibitor A3K OS=Mus musculus OX=10090 GN=Serpina3k PE=1 SV=2                       | 3,44                               | 0,0000                                     |
| High                             | Q60590    | 3                 | <b>Orm1</b>      | Alpha-1-acid glycoprotein 1 OS=Mus musculus OX=10090 GN=Orm1 PE=1 SV=1                              | 3,43                               | 0,0000                                     |
| High                             | Q92111    | 38                | <b>Tf</b>        | Serotransferrin OS=Mus musculus OX=10090 GN=Tf PE=1 SV=1                                            | 3,41                               | 0,0000                                     |
| High                             | P20152    | 29                | <b>Vim</b>       | Vimentin OS=Mus musculus OX=10090 GN=Vim PE=1 SV=3                                                  | 3,21                               | 0,0000                                     |
| High                             | Q61704    | 12                | <b>Itih3</b>     | Inter-alpha-trypsin inhibitor heavy chain H3 OS=Mus musculus OX=10090 GN=Itih3 PE=1 SV=3            | 3,11                               | 0,0000                                     |
| High                             | P01899    | 5                 | <b>H2-D1</b>     | H-2 class I histocompatibility antigen, D-B alpha chain OS=Mus musculus OX=10090 GN=H2-D1 PE=1 SV=2 | 3,09                               | 0,0000                                     |
| High                             | P28665    | 27                | <b>Mug1</b>      | Murinoglobulin-1 OS=Mus musculus OX=10090 GN=Mug1 PE=1 SV=3                                         | 3,02                               | 0,0000                                     |
| High                             | Q61702    | 13                | <b>Itih1</b>     | Inter-alpha-trypsin inhibitor heavy chain H1 OS=Mus musculus OX=10090 GN=Itih1 PE=1 SV=2            | 3,00                               | 0,0000                                     |
| High                             | Q8VCM7    | 17                | <b>Fgg</b>       | Fibrinogen gamma chain OS=Mus musculus OX=10090 GN=Fgg PE=1 SV=1                                    | 2,94                               | 0,0000                                     |

|        |        |    |                  |                                                                                                     |      |        |
|--------|--------|----|------------------|-----------------------------------------------------------------------------------------------------|------|--------|
| High   | P19221 | 5  | <b>F2</b>        | Prothrombin OS=Mus musculus OX=10090 GN=F2 PE=1 SV=1                                                | 2,84 | 0,0000 |
| High   | Q9DB25 | 3  | <b>Alg5</b>      | Dolichyl-phosphate beta-glucosyltransferase OS=Mus musculus OX=10090 GN=Alg5 PE=1 SV=1              | 2,69 | 0,0000 |
| High   | P51880 | 6  | <b>Fabp7</b>     | Fatty acid-binding protein, brain OS=Mus musculus OX=10090 GN=Fabp7 PE=1 SV=2                       | 2,67 | 0,0000 |
| High   | E9PV24 | 12 | <b>Fga</b>       | Fibrinogen alpha chain OS=Mus musculus OX=10090 GN=Fga PE=1 SV=1                                    | 2,53 | 0,0000 |
| High   | Q61838 | 36 | <b>Pzp</b>       | Pregnancy zone protein OS=Mus musculus OX=10090 GN=Pzp PE=1 SV=3                                    | 2,51 | 0,0000 |
| High   | Q8K0E8 | 16 | <b>Fgb</b>       | Fibrinogen beta chain OS=Mus musculus OX=10090 GN=Fgb PE=1 SV=1                                     | 2,48 | 0,0000 |
| High   | O70200 | 3  | <b>Aif1</b>      | Allograft inflammatory factor 1 OS=Mus musculus OX=10090 GN=Aif1 PE=1 SV=1                          | 2,33 | 0,0000 |
| High   | Q61147 | 21 | <b>Cp</b>        | Ceruloplasmin OS=Mus musculus OX=10090 GN=Cp PE=1 SV=2                                              | 2,29 | 0,0000 |
| High   | Q00623 | 11 | <b>Apoa1</b>     | Apolipoprotein A-I OS=Mus musculus OX=10090 GN=Apoa1 PE=1 SV=2                                      | 2,29 | 0,0000 |
| High   | Q9CYL5 | 2  | <b>Glipr2</b>    | Golgi-associated plant pathogenesis-related protein 1 OS=Mus musculus OX=10090 GN=Glipr2 PE=1 SV=3  | 2,29 | 0,0000 |
| High   | P05555 | 5  | <b>Itgam</b>     | Integrin alpha-M OS=Mus musculus OX=10090 GN=Itgam PE=1 SV=2                                        | 2,21 | 0,0000 |
| High   | Q91VS7 | 1  | <b>Mgst1</b>     | Microsomal glutathione S-transferase 1 OS=Mus musculus OX=10090 GN=Mgst1 PE=1 SV=3                  | 2,17 | 0,0000 |
| High   | P01869 | 6  | <b>Ighg1</b>     | Ig gamma-1 chain C region, membrane-bound form OS=Mus musculus OX=10090 GN=Ighg1 PE=1 SV=2          | 2,10 | 0,0000 |
| High   | P07356 | 14 | <b>Anxa2</b>     | Annexin A2 OS=Mus musculus OX=10090 GN=Anxa2 PE=1 SV=2                                              | 2,10 | 0,0000 |
| High   | P19324 | 11 | <b>Serpinh1</b>  | Serpin H1 OS=Mus musculus OX=10090 GN=Serpinh1 PE=1 SV=3                                            | 2,07 | 0,0000 |
| High   | Q9ESB3 | 7  | <b>Hrg</b>       | Histidine-rich glycoprotein OS=Mus musculus OX=10090 GN=Hrg PE=1 SV=2                               | 2,06 | 0,0011 |
| Medium | Q8BL80 | 1  | <b>Arhgap22</b>  | Rho GTPase-activating protein 22 OS=Mus musculus OX=10090 GN=Arhgap22 PE=1 SV=2                     | 2,03 | 0,0000 |
| High   | P14106 | 6  | <b>C1qb</b>      | Complement C1q subcomponent subunit B OS=Mus musculus OX=10090 GN=C1qb PE=1 SV=2                    | 2,02 | 0,0000 |
| High   | Q9WVA4 | 9  | <b>Tagln2</b>    | Transgelin-2 OS=Mus musculus OX=10090 GN=Tagln2 PE=1 SV=4                                           | 2,01 | 0,0000 |
| High   | P16045 | 5  | <b>Lgals1</b>    | Galectin-1 OS=Mus musculus OX=10090 GN=Lgals1 PE=1 SV=3                                             | 2,01 | 0,0000 |
| High   | Q9JM63 | 7  | <b>Kcnj10</b>    | ATP-sensitive inward rectifier potassium channel 10 OS=Mus musculus OX=10090 GN=Kcnj10 PE=1 SV=1    | 1,99 | 0,0000 |
| High   | P04186 | 6  | <b>Cfb</b>       | Complement factor B OS=Mus musculus OX=10090 GN=Cfb PE=1 SV=2                                       | 1,99 | 0,0006 |
| High   | Q8VHL0 | 2  | <b>Slc14a1</b>   | Urea transporter 1 OS=Mus musculus OX=10090 GN=Slc14a1 PE=1 SV=2                                    | 1,97 | 0,0001 |
| High   | P11835 | 13 | <b>Itgb2</b>     | Integrin beta-2 OS=Mus musculus OX=10090 GN=Itgb2 PE=1 SV=2                                         | 1,91 | 0,0001 |
| High   | P98086 | 5  | <b>C1qa</b>      | Complement C1q subcomponent subunit A OS=Mus musculus OX=10090 GN=C1qa PE=1 SV=2                    | 1,88 | 0,0000 |
| High   | P56695 | 18 | <b>Wfs1</b>      | Wolframin OS=Mus musculus OX=10090 GN=Wfs1 PE=1 SV=1                                                | 1,86 | 0,0000 |
| Medium | O35566 | 2  | <b>Cd151</b>     | CD151 antigen OS=Mus musculus OX=10090 GN=Cd151 PE=1 SV=2                                           | 1,85 | 0,0007 |
| High   | P42225 | 8  | <b>Stat1</b>     | Signal transducer and activator of transcription 1 OS=Mus musculus OX=10090 GN=Stat1 PE=1 SV=1      | 1,85 | 0,0005 |
| High   | Q61233 | 21 | <b>Lcp1</b>      | Plastin-2 OS=Mus musculus OX=10090 GN=Lcp1 PE=1 SV=4                                                | 1,81 | 0,0003 |
| High   | Q00897 | 4  | <b>Serpina1d</b> | Alpha-1-antitrypsin 1-4 OS=Mus musculus OX=10090 GN=Serpina1d PE=1 SV=1                             | 1,81 | 0,0001 |
| High   | Q9JHR7 | 24 | <b>Ide</b>       | Insulin-degrading enzyme OS=Mus musculus OX=10090 GN=Ide PE=1 SV=1                                  | 1,78 | 0,0004 |
| High   | Q8R2Y2 | 2  | <b>Mcam</b>      | Cell surface glycoprotein MUC18 OS=Mus musculus OX=10090 GN=Mcam PE=1 SV=1                          | 1,77 | 0,0044 |
| Medium | Q9JF0  | 1  | <b>Nap1I5</b>    | Nucleosome assembly protein 1-like 5 OS=Mus musculus OX=10090 GN=Nap1I5 PE=1 SV=1                   | 1,76 | 0,0001 |
| High   | Q61599 | 4  | <b>Arhgdib</b>   | Rho GDP-dissociation inhibitor 2 OS=Mus musculus OX=10090 GN=Arhgdib PE=1 SV=3                      | 1,76 | 0,0020 |
| High   | Q91VW3 | 2  | <b>Sh3bgrl3</b>  | SH3 domain-binding glutamic acid-rich-like protein 3 OS=Mus musculus OX=10090 GN=Sh3bgrl3 PE=1 SV=1 | 1,76 | 0,0008 |
| High   | Q9Z1Q5 | 9  | <b>Clic1</b>     | Chloride intracellular channel protein 1 OS=Mus musculus OX=10090 GN=Clic1 PE=1 SV=3                | 1,76 | 0,0003 |

|        |        |    |                |                                                                                                                   |      |        |
|--------|--------|----|----------------|-------------------------------------------------------------------------------------------------------------------|------|--------|
| High   | Q02105 | 5  | <b>C1qc</b>    | Complement C1q subcomponent subunit C OS=Mus musculus OX=10090 GN=C1qc PE=1 SV=2                                  | 1,72 | 0,0002 |
| High   | P06909 | 16 | <b>Cfh</b>     | Complement factor H OS=Mus musculus OX=10090 GN=Cfh PE=1 SV=2                                                     | 1,66 | 0,0061 |
| High   | Q61739 | 10 | <b>Itga6</b>   | Integrin alpha-6 OS=Mus musculus OX=10090 GN=Itga6 PE=1 SV=3                                                      | 1,65 | 0,0022 |
| High   | P62960 | 5  | <b>Ybx1</b>    | Y-box-binding protein 1 OS=Mus musculus OX=10090 GN=Ybx1 PE=1 SV=3                                                | 1,64 | 0,0006 |
| High   | Q9WVA2 | 2  | <b>Timm8a1</b> | Mitochondrial import inner membrane translocase subunit Tim8 A OS=Mus musculus OX=10090 GN=Timm8a1 PE=1 SV=1      | 1,63 | 0,0298 |
| High   | P52503 | 5  | <b>Ndufs6</b>  | NADH dehydrogenase [ubiquinone] iron-sulfur protein 6, mitochondrial OS=Mus musculus OX=10090 GN=Ndufs6 PE=1 SV=2 | 1,62 | 0,0023 |
| High   | P11276 | 10 | <b>Fn1</b>     | Fibronectin OS=Mus musculus OX=10090 GN=Fn1 PE=1 SV=4                                                             | 1,61 | 0,0053 |
| High   | Q9DCJ9 | 6  | <b>Npl</b>     | N-acetylneuraminatase lyase OS=Mus musculus OX=10090 GN=Npl PE=1 SV=1                                             | 1,60 | 0,0092 |
| High   | P51910 | 2  | <b>Apod</b>    | Apolipoprotein D OS=Mus musculus OX=10090 GN=Apod PE=1 SV=1                                                       | 1,60 | 0,0091 |
| High   | Q99KR3 | 3  | <b>Lactb2</b>  | Endoribonuclease LACTB2 OS=Mus musculus OX=10090 GN=Lactb2 PE=1 SV=1                                              | 1,59 | 0,0093 |
| Medium | O54890 | 1  | <b>Itgb3</b>   | Integrin beta-3 OS=Mus musculus OX=10090 GN=Itgb3 PE=1 SV=2                                                       | 1,59 | 0,0020 |
| High   | P42227 | 6  | <b>Stat3</b>   | Signal transducer and activator of transcription 3 OS=Mus musculus OX=10090 GN=Stat3 PE=1 SV=2                    | 1,57 | 0,0235 |
| High   | Q06890 | 13 | <b>Clu</b>     | Clusterin OS=Mus musculus OX=10090 GN=Clu PE=1 SV=1                                                               | 1,56 | 0,0031 |
| High   | O70340 | 8  | <b>Nptx2</b>   | Neuronal pentraxin-2 OS=Mus musculus OX=10090 GN=Nptx2 PE=2 SV=1                                                  | 1,56 | 0,0021 |
| High   | Q8BTM8 | 35 | <b>Flna</b>    | Filamin-A OS=Mus musculus OX=10090 GN=Flna PE=1 SV=5                                                              | 1,56 | 0,0073 |
| High   | Q05816 | 9  | <b>Fabp5</b>   | Fatty acid-binding protein 5 OS=Mus musculus OX=10090 GN=Fabp5 PE=1 SV=3                                          | 1,56 | 0,0080 |
| High   | Q9WV32 | 8  | <b>Arcp1b</b>  | Actin-related protein 2/3 complex subunit 1B OS=Mus musculus OX=10090 GN=Arcp1b PE=1 SV=4                         | 1,55 | 0,0078 |
| High   | Q61FZ6 | 5  | <b>Krt77</b>   | Keratin, type II cytoskeletal 1b OS=Mus musculus OX=10090 GN=Krt77 PE=1 SV=1                                      | 1,54 | 0,0020 |
| High   | Q91Z38 | 3  | <b>Ttc1</b>    | Tetratricopeptide repeat protein 1 OS=Mus musculus OX=10090 GN=Ttc1 PE=1 SV=1                                     | 1,54 | 0,0119 |
| Medium | P20491 | 1  | <b>Fcer1g</b>  | High affinity immunoglobulin epsilon receptor subunit gamma OS=Mus musculus OX=10090 GN=Fcer1g PE=1 SV=1          | 1,54 | 0,0106 |
| High   | Q9DCT8 | 4  | <b>Crip2</b>   | Cysteine-rich protein 2 OS=Mus musculus OX=10090 GN=Crip2 PE=1 SV=1                                               | 1,54 | 0,0048 |
| High   | A3KMP2 | 3  | <b>Ttc38</b>   | Tetratricopeptide repeat protein 38 OS=Mus musculus OX=10090 GN=Ttc38 PE=1 SV=2                                   | 1,53 | 0,0165 |
| High   | Q80WW9 | 1  | <b>Ddrgk1</b>  | DDRKG domain-containing protein 1 OS=Mus musculus OX=10090 GN=Ddrgk1 PE=1 SV=2                                    | 1,53 | 0,0182 |
| Medium | Q9EST4 | 2  | <b>Psmg2</b>   | Proteasome assembly chaperone 2 OS=Mus musculus OX=10090 GN=Psmg2 PE=1 SV=1                                       | 1,52 | 0,0031 |
| High   | O89106 | 3  | <b>Fhit</b>    | Bis(5'-adenosyl)-triphosphatase OS=Mus musculus OX=10090 GN=Fhit PE=1 SV=3                                        | 1,51 | 0,0213 |
| High   | P01872 | 11 | <b>Ighm</b>    | Immunoglobulin heavy constant mu OS=Mus musculus OX=10090 GN=Ighm PE=1 SV=2                                       | 1,51 | 0,0066 |
| High   | P70689 | 2  | <b>Gjb6</b>    | Gap junction beta-6 protein OS=Mus musculus OX=10090 GN=Gjb6 PE=1 SV=1                                            | 1,51 | 0,0154 |
| High   | P08228 | 7  | <b>Sod1</b>    | Superoxide dismutase [Cu-Zn] OS=Mus musculus OX=10090 GN=Sod1 PE=1 SV=2                                           | 1,50 | 0,0051 |
| High   | O55137 | 5  | <b>Acot1</b>   | Acyl-coenzyme A thioesterase 1 OS=Mus musculus OX=10090 GN=Acot1 PE=1 SV=1                                        | 1,50 | 0,0111 |
| High   | P47867 | 4  | <b>Scg3</b>    | Secretogranin-3 OS=Mus musculus OX=10090 GN=Scg3 PE=1 SV=1                                                        | 1,50 | 0,0058 |
| High   | Q9DC50 | 6  | <b>Crot</b>    | Peroxisomal carnitine O-octanoyltransferase OS=Mus musculus OX=10090 GN=Crot PE=1 SV=1                            | 1,49 | 0,0203 |
| High   | P97352 | 4  | <b>S100a13</b> | Protein S100-A13 OS=Mus musculus OX=10090 GN=S100a13 PE=1 SV=1                                                    | 1,49 | 0,0055 |
| High   | Q62178 | 9  | <b>Sema4a</b>  | Semaphorin-4A OS=Mus musculus OX=10090 GN=Sema4a PE=1 SV=2                                                        | 1,48 | 0,0073 |

|        |        |    |                |                                                                                                        |      |        |
|--------|--------|----|----------------|--------------------------------------------------------------------------------------------------------|------|--------|
| High   | Q9DC11 | 2  | <b>Plxdc2</b>  | Plexin domain-containing protein 2 OS=Mus musculus OX=10090 GN=Plxdc2 PE=1 SV=1                        | 1,48 | 0,0267 |
| High   | Q9JL62 | 9  | <b>Gltp</b>    | Glycolipid transfer protein OS=Mus musculus OX=10090 GN=Gltp PE=1 SV=3                                 | 1,47 | 0,0112 |
| High   | P62313 | 3  | <b>Lsm6</b>    | U6 snRNA-associated Sm-like protein LSm6 OS=Mus musculus OX=10090 GN=Lsm6 PE=1 SV=1                    | 1,47 | 0,0154 |
| High   | P97449 | 16 | <b>Anpep</b>   | Aminopeptidase N OS=Mus musculus OX=10090 GN=Anpep PE=1 SV=4                                           | 1,47 | 0,0217 |
| High   | P21981 | 13 | <b>Tgm2</b>    | Protein-glutamine gamma-glutamyltransferase 2 OS=Mus musculus OX=10090 GN=Tgm2 PE=1 SV=4               | 1,47 | 0,0099 |
| High   | Q8R332 | 2  | <b>Nup58</b>   | Nucleoporin p58/p45 OS=Mus musculus OX=10090 GN=Nup58 PE=1 SV=1                                        | 1,47 | 0,0249 |
| High   | O89017 | 4  | <b>Lgmn</b>    | Legumain OS=Mus musculus OX=10090 GN=Lgmn PE=1 SV=1                                                    | 1,47 | 0,0076 |
| High   | Q60829 | 8  | <b>Ppp1r1b</b> | Protein phosphatase 1 regulatory subunit 1B OS=Mus musculus OX=10090 GN=Ppp1r1b PE=1 SV=2              | 1,46 | 0,0053 |
| High   | Q9WVT6 | 3  | <b>Ca14</b>    | Carbonic anhydrase 14 OS=Mus musculus OX=10090 GN=Ca14 PE=1 SV=1                                       | 1,46 | 0,0239 |
| High   | Q9ERT9 | 4  | <b>Ppp1r1a</b> | Protein phosphatase 1 regulatory subunit 1A OS=Mus musculus OX=10090 GN=Ppp1r1a PE=1 SV=1              | 1,45 | 0,0294 |
| High   | Q3UV17 | 1  | <b>Krt76</b>   | Keratin, type II cytoskeletal 2 oral OS=Mus musculus OX=10090 GN=Krt76 PE=1 SV=1                       | 1,45 | 0,0137 |
| High   | O35639 | 17 | <b>Anxa3</b>   | Annexin A3 OS=Mus musculus OX=10090 GN=Anxa3 PE=1 SV=4                                                 | 1,44 | 0,0095 |
| High   | O08739 | 7  | <b>Ampd3</b>   | AMP deaminase 3 OS=Mus musculus OX=10090 GN=Ampd3 PE=1 SV=2                                            | 1,44 | 0,0309 |
| High   | Q8K4M5 | 3  | <b>Commd1</b>  | COMM domain-containing protein 1 OS=Mus musculus OX=10090 GN=Commd1 PE=1 SV=2                          | 1,44 | 0,0212 |
| High   | P11438 | 4  | <b>Lamp1</b>   | Lysosome-associated membrane glycoprotein 1 OS=Mus musculus OX=10090 GN=Lamp1 PE=1 SV=2                | 1,44 | 0,0229 |
| High   | Q8VCI5 | 5  | <b>Pex19</b>   | Peroxisomal biogenesis factor 19 OS=Mus musculus OX=10090 GN=Pex19 PE=1 SV=1                           | 1,44 | 0,0460 |
| Medium | Q9R1Q7 | 1  | <b>Plp2</b>    | Proteolipid protein 2 OS=Mus musculus OX=10090 GN=Plp2 PE=1 SV=1                                       | 1,44 | 0,0308 |
| High   | Q9D708 | 2  | <b>S100a16</b> | Protein S100-A16 OS=Mus musculus OX=10090 GN=S100a16 PE=1 SV=1                                         | 1,43 | 0,0131 |
| High   | Q61792 | 6  | <b>Lasp1</b>   | LIM and SH3 domain protein 1 OS=Mus musculus OX=10090 GN=Lasp1 PE=1 SV=1                               | 1,43 | 0,0104 |
| High   | Q02819 | 13 | <b>Nucb1</b>   | Nucleobindin-1 OS=Mus musculus OX=10090 GN=Nucb1 PE=1 SV=2                                             | 1,43 | 0,0379 |
| High   | Q8BHK2 | 3  | <b>Scn3b</b>   | Sodium channel subunit beta-3 OS=Mus musculus OX=10090 GN=Scn3b PE=1 SV=1                              | 1,42 | 0,0348 |
| High   | Q8C3X2 | 2  | <b>Ccdc90b</b> | Coiled-coil domain-containing protein 90B, mitochondrial OS=Mus musculus OX=10090 GN=Ccdc90b PE=1 SV=1 | 1,42 | 0,0344 |
| High   | P57716 | 12 | <b>Ncstn</b>   | Nicastrin OS=Mus musculus OX=10090 GN=Ncstn PE=1 SV=3                                                  | 1,42 | 0,0200 |
| High   | Q91W90 | 9  | <b>Txndc5</b>  | Thioredoxin domain-containing protein 5 OS=Mus musculus OX=10090 GN=Txndc5 PE=1 SV=2                   | 1,42 | 0,0375 |
| High   | P63300 | 3  | <b>Selenow</b> | Selenoprotein W OS=Mus musculus OX=10090 GN=Selenow PE=1 SV=3                                          | 1,41 | 0,0425 |
| High   | Q9CR20 | 1  | <b>Ier3ip1</b> | Immediate early response 3-interacting protein 1 OS=Mus musculus OX=10090 GN=Ier3ip1 PE=3 SV=1         | 1,41 | 0,0382 |
| High   | P21460 | 5  | <b>Cst3</b>    | Cystatin-C OS=Mus musculus OX=10090 GN=Cst3 PE=1 SV=2                                                  | 1,41 | 0,0262 |
| High   | P01942 | 8  | <b>Hba</b>     | Hemoglobin subunit alpha OS=Mus musculus OX=10090 GN=Hba PE=1 SV=2                                     | 1,41 | 0,0217 |
| High   | Q99JF5 | 4  | <b>Mvd</b>     | Diphosphomevalonate decarboxylase OS=Mus musculus OX=10090 GN=Mvd PE=1 SV=2                            | 1,41 | 0,0494 |
| High   | Q03517 | 3  | <b>Scg2</b>    | Secretogranin-2 OS=Mus musculus OX=10090 GN=Scg2 PE=1 SV=1                                             | 1,41 | 0,0455 |
| High   | P17047 | 5  | <b>Lamp2</b>   | Lysosome-associated membrane glycoprotein 2 OS=Mus musculus OX=10090 GN=Lamp2 PE=1 SV=2                | 1,41 | 0,0271 |
| High   | P10605 | 14 | <b>Ctsb</b>    | Cathepsin B OS=Mus musculus OX=10090 GN=Ctsb PE=1 SV=2                                                 | 1,41 | 0,0264 |
| High   | P09055 | 21 | <b>Itgb1</b>   | Integrin beta-1 OS=Mus musculus OX=10090 GN=Itgb1 PE=1 SV=1                                            | 1,41 | 0,0142 |
| High   | Q00915 | 9  | <b>Rbp1</b>    | Retinol-binding protein 1 OS=Mus musculus OX=10090 GN=Rbp1 PE=1 SV=2                                   | 1,41 | 0,0283 |
| High   | P13020 | 22 | <b>Gsn</b>     | Gelsolin OS=Mus musculus OX=10090 GN=Gsn PE=1 SV=3                                                     | 1,41 | 0,0276 |

|      |        |    |                 |                                                                                                                                                |      |        |
|------|--------|----|-----------------|------------------------------------------------------------------------------------------------------------------------------------------------|------|--------|
| High | P18242 | 13 | <b>Ctsd</b>     | Cathepsin D OS=Mus musculus OX=10090 GN=Ctsd PE=1 SV=1                                                                                         | 1,41 | 0,0237 |
| High | P16675 | 7  | <b>Ctsa</b>     | Lysosomal protective protein OS=Mus musculus OX=10090 GN=Ctsa PE=1 SV=1                                                                        | 1,40 | 0,0154 |
| High | P17439 | 6  | <b>Gba</b>      | Lysosomal acid glucosylceramidase OS=Mus musculus OX=10090 GN=Gba PE=1 SV=1                                                                    | 1,40 | 0,0472 |
| High | P20060 | 20 | <b>Hexb</b>     | Beta-hexosaminidase subunit beta OS=Mus musculus OX=10090 GN=Hexb PE=1 SV=2                                                                    | 1,40 | 0,0275 |
| High | Q00493 | 18 | <b>Cpe</b>      | Carboxypeptidase E OS=Mus musculus OX=10090 GN=Cpe PE=1 SV=2                                                                                   | 1,40 | 0,0188 |
| High | O35114 | 10 | <b>Scarb2</b>   | Lysosome membrane protein 2 OS=Mus musculus OX=10090 GN=Scarb2 PE=1 SV=3                                                                       | 1,40 | 0,0107 |
| High | Q9ER00 | 12 | <b>Stx12</b>    | Syntaxin-12 OS=Mus musculus OX=10090 GN=Stx12 PE=1 SV=1                                                                                        | 1,39 | 0,0428 |
| High | Q99J85 | 15 | <b>Nptxr</b>    | Neuronal pentraxin receptor OS=Mus musculus OX=10090 GN=Nptxr PE=1 SV=1                                                                        | 1,39 | 0,0447 |
| High | Q91WE4 | 1  |                 | UPF0729 protein C18orf32 homolog OS=Mus musculus OX=10090 PE=3 SV=1                                                                            | 1,39 | 0,0476 |
| High | P97371 | 11 | <b>Psme1</b>    | Proteasome activator complex subunit 1 OS=Mus musculus OX=10090 GN=Psme1 PE=1 SV=2                                                             | 1,39 | 0,0303 |
| High | Q922J6 | 3  | <b>Tspan2</b>   | Tetraspanin-2 OS=Mus musculus OX=10090 GN=Tspan2 PE=1 SV=1                                                                                     | 1,39 | 0,0275 |
| High | Q6P5H2 | 3  | <b>Nes</b>      | Nestin OS=Mus musculus OX=10090 GN=Nes PE=1 SV=1                                                                                               | 1,38 | 0,0332 |
| High | P04104 | 4  | <b>Krt1</b>     | Keratin, type II cytoskeletal 1 OS=Mus musculus OX=10090 GN=Krt1 PE=1 SV=4                                                                     | 1,38 | 0,0331 |
| High | P56812 | 6  | <b>Pdcd5</b>    | Programmed cell death protein 5 OS=Mus musculus OX=10090 GN=Pdcd5 PE=1 SV=3                                                                    | 1,38 | 0,0383 |
| High | P09103 | 23 | <b>P4hb</b>     | Protein disulfide-isomerase OS=Mus musculus OX=10090 GN=P4hb PE=1 SV=2                                                                         | 1,38 | 0,0390 |
| High | P81122 | 2  | <b>Irs2</b>     | Insulin receptor substrate 2 OS=Mus musculus OX=10090 GN=Irs2 PE=1 SV=2                                                                        | 1,37 | 0,0366 |
| High | Q60766 | 5  | <b>Irgm1</b>    | Immunity-related GTPase family M protein 1 OS=Mus musculus OX=10090 GN=Irgm1 PE=1 SV=1                                                         | 1,37 | 0,0451 |
| High | P97450 | 4  | <b>Atp5pf</b>   | ATP synthase-coupling factor 6, mitochondrial OS=Mus musculus OX=10090 GN=Atp5pf PE=1 SV=1                                                     | 1,37 | 0,0284 |
| High | Q6IME9 | 2  | <b>Krt72</b>    | Keratin, type II cytoskeletal 72 OS=Mus musculus OX=10090 GN=Krt72 PE=3 SV=1                                                                   | 1,37 | 0,0424 |
| High | Q9DBS1 | 11 | <b>Tmem43</b>   | Transmembrane protein 43 OS=Mus musculus OX=10090 GN=Tmem43 PE=1 SV=1                                                                          | 1,36 | 0,0471 |
| High | Q6IRU2 | 11 | <b>Tpm4</b>     | Tropomyosin alpha-4 chain OS=Mus musculus OX=10090 GN=Tpm4 PE=1 SV=3                                                                           | 1,36 | 0,0421 |
| High | P70699 | 18 | <b>Gaa</b>      | Lysosomal alpha-glucosidase OS=Mus musculus OX=10090 GN=Gaa PE=1 SV=2                                                                          | 1,35 | 0,0353 |
| High | Q9R099 | 8  | <b>Tbl2</b>     | Transducin beta-like protein 2 OS=Mus musculus OX=10090 GN=Tbl2 PE=1 SV=2                                                                      | 1,35 | 0,0414 |
| High | Q61646 | 8  | <b>Hp</b>       | Haptoglobin OS=Mus musculus OX=10090 GN=Hp PE=1 SV=1                                                                                           | 1,35 | 0,0428 |
| High | O35143 | 2  | <b>ATP5IF1</b>  | ATPase inhibitor, mitochondrial OS=Mus musculus OX=10090 GN=ATP5IF1 PE=1 SV=2                                                                  | 1,34 | 0,0346 |
| High | P28667 | 4  | <b>Marcks1</b>  | MARCKS-related protein OS=Mus musculus OX=10090 GN=Marcks1 PE=1 SV=2                                                                           | 1,34 | 0,0344 |
| High | P58771 | 9  | <b>Tpm1</b>     | Tropomyosin alpha-1 chain OS=Mus musculus OX=10090 GN=Tpm1 PE=1 SV=1                                                                           | 1,34 | 0,0429 |
| High | P51855 | 15 | <b>Gss</b>      | Glutathione synthetase OS=Mus musculus OX=10090 GN=Gss PE=1 SV=1                                                                               | 1,33 | 0,0354 |
| High | Q6ZQJ3 | 9  | <b>Mlec</b>     | Malectin OS=Mus musculus OX=10090 GN=Mlec PE=1 SV=2                                                                                            | 1,33 | 0,0429 |
| High | Q9D154 | 12 | <b>Serpib1a</b> | Leukocyte elastase inhibitor A OS=Mus musculus OX=10090 GN=Serpib1a PE=1 SV=1                                                                  | 1,32 | 0,0465 |
| High | Q3URE9 | 3  | <b>Lingo2</b>   | Leucine-rich repeat and immunoglobulin-like domain-containing nogo receptor-interacting protein 2 OS=Mus musculus OX=10090 GN=Lingo2 PE=2 SV=1 | 1,31 | 0,0482 |
| High | P20444 | 14 | <b>Prkca</b>    | Protein kinase C alpha type OS=Mus musculus OX=10090 GN=Prkca PE=1 SV=3                                                                        | 0,78 | 0,0409 |
| High | Q6NS60 | 29 | <b>Fbxo41</b>   | F-box only protein 41 OS=Mus musculus OX=10090 GN=Fbxo41 PE=1 SV=3                                                                             | 0,77 | 0,0467 |
| High | Q8CJ40 | 17 | <b>Crocc</b>    | Rootletin OS=Mus musculus OX=10090 GN=Crocc PE=1 SV=2                                                                                          | 0,77 | 0,0489 |
| High | P35438 | 24 | <b>Grin1</b>    | Glutamate receptor ionotropic, NMDA 1 OS=Mus musculus OX=10090 GN=Grin1 PE=1 SV=1                                                              | 0,77 | 0,0421 |

|        |        |    |                 |                                                                                                                  |      |        |
|--------|--------|----|-----------------|------------------------------------------------------------------------------------------------------------------|------|--------|
| High   | Q6PH08 | 33 | <b>Erc2</b>     | ERC protein 2 OS=Mus musculus OX=10090 GN=Erc2 PE=1 SV=2                                                         | 0,77 | 0,0436 |
| High   | Q01097 | 43 | <b>Grin2b</b>   | Glutamate receptor ionotropic, NMDA 2B OS=Mus musculus OX=10090 GN=Grin2b PE=1 SV=3                              | 0,76 | 0,0335 |
| High   | Q8BJ42 | 33 | <b>Dlgap2</b>   | Disks large-associated protein 2 OS=Mus musculus OX=10090 GN=Dlgap2 PE=1 SV=2                                    | 0,76 | 0,0323 |
| High   | Q8C015 | 21 | <b>Pak5</b>     | Serine/threonine-protein kinase PAK 5 OS=Mus musculus OX=10090 GN=Pak5 PE=1 SV=1                                 | 0,75 | 0,0397 |
| High   | Q4ACU6 | 53 | <b>Shank3</b>   | SH3 and multiple ankyrin repeat domains protein 3 OS=Mus musculus OX=10090 GN=Shank3 PE=1 SV=3                   | 0,75 | 0,0296 |
| High   | P48543 | 4  | <b>Kcnj9</b>    | G protein-activated inward rectifier potassium channel 3 OS=Mus musculus OX=10090 GN=Kcnj9 PE=1 SV=2             | 0,75 | 0,0334 |
| High   | Q5DU25 | 45 | <b>Iqsec2</b>   | IQ motif and SEC7 domain-containing protein 2 OS=Mus musculus OX=10090 GN=Iqsec2 PE=1 SV=3                       | 0,74 | 0,0345 |
| High   | Q62108 | 30 | <b>Dlg4</b>     | Disks large homolog 4 OS=Mus musculus OX=10090 GN=Dlg4 PE=1 SV=1                                                 | 0,74 | 0,0171 |
| High   | Q8BIZ1 | 23 | <b>Anks1b</b>   | Ankyrin repeat and sterile alpha motif domain-containing protein 1B OS=Mus musculus OX=10090 GN=Anks1b PE=1 SV=3 | 0,73 | 0,0148 |
| High   | Q3V132 | 1  | <b>Slc25a31</b> | ADP/ATP translocase 4 OS=Mus musculus OX=10090 GN=Slc25a31 PE=1 SV=1                                             | 0,73 | 0,0423 |
| High   | Q8BXR9 | 20 | <b>Osbpl6</b>   | Oxysterol-binding protein-related protein 6 OS=Mus musculus OX=10090 GN=Osbpl6 PE=1 SV=1                         | 0,72 | 0,0463 |
| High   | Q68EF6 | 25 | <b>Begain</b>   | Brain-enriched guanylate kinase-associated protein OS=Mus musculus OX=10090 GN=Begain PE=1 SV=2                  | 0,72 | 0,0102 |
| High   | Q61418 | 7  | <b>Cln4</b>     | H(+)/Cl(-) exchange transporter 4 OS=Mus musculus OX=10090 GN=Cln4 PE=2 SV=2                                     | 0,72 | 0,0423 |
| High   | Q8VHQ9 | 22 | <b>Acot11</b>   | Acyl-coenzyme A thioesterase 11 OS=Mus musculus OX=10090 GN=Acot11 PE=1 SV=1                                     | 0,72 | 0,0330 |
| High   | Q9Z0V2 | 13 | <b>Kcnd2</b>    | Potassium voltage-gated channel subfamily D member 2 OS=Mus musculus OX=10090 GN=Kcnd2 PE=1 SV=1                 | 0,72 | 0,0448 |
| High   | F6SEU4 | 51 | <b>Syngap1</b>  | Ras/Rap GTPase-activating protein SynGAP OS=Mus musculus OX=10090 GN=Syngap1 PE=1 SV=2                           | 0,71 | 0,0104 |
| Medium | Q8BH61 | 1  | <b>F13a1</b>    | Coagulation factor XIII A chain OS=Mus musculus OX=10090 GN=F13a1 PE=1 SV=3                                      | 0,71 | 0,0282 |
| High   | D3Z7H4 | 5  | <b>Gsg1l</b>    | Germ cell-specific gene 1-like protein OS=Mus musculus OX=10090 GN=Gsg1l PE=1 SV=2                               | 0,71 | 0,0360 |
| High   | P01741 | 1  |                 | Ig heavy chain V region OS=Mus musculus OX=10090 PE=1 SV=1                                                       | 0,71 | 0,0264 |
| High   | Q99KX1 | 9  | <b>Mlf2</b>     | Myeloid leukemia factor 2 OS=Mus musculus OX=10090 GN=Mlf2 PE=1 SV=1                                             | 0,70 | 0,0092 |
| High   | Q9D7V2 | 2  | <b>Lysmd2</b>   | LysM and putative peptidoglycan-binding domain-containing protein 2 OS=Mus musculus OX=10090 GN=Lysmd2 PE=1 SV=2 | 0,68 | 0,0156 |
| High   | Q3TKT4 | 6  | <b>Smarca4</b>  | Transcription activator BRG1 OS=Mus musculus OX=10090 GN=Smarca4 PE=1 SV=1                                       | 0,68 | 0,0183 |
| High   | Q9WU79 | 19 | <b>Prodh</b>    | Proline dehydrogenase 1, mitochondrial OS=Mus musculus OX=10090 GN=Prodh PE=1 SV=2                               | 0,65 | 0,0093 |
| High   | Q3UXZ6 | 17 | <b>Fam81a</b>   | Protein FAM81A OS=Mus musculus OX=10090 GN=Fam81a PE=1 SV=2                                                      | 0,65 | 0,0086 |
| High   | Q8BGU2 | 1  | <b>Cbln2</b>    | Cerebellin-2 OS=Mus musculus OX=10090 GN=Cbln2 PE=1 SV=1                                                         | 0,64 | 0,0477 |
| High   | A2A8L1 | 4  | <b>Chd5</b>     | Chromodomain-helicase-DNA-binding protein 5 OS=Mus musculus OX=10090 GN=Chd5 PE=1 SV=1                           | 0,63 | 0,0322 |
| High   | Q8VHR5 | 6  | <b>Gatad2b</b>  | Transcriptional repressor p66-beta OS=Mus musculus OX=10090 GN=Gatad2b PE=1 SV=1                                 | 0,63 | 0,0322 |
| High   | P70268 | 6  | <b>Pkn1</b>     | Serine/threonine-protein kinase N1 OS=Mus musculus OX=10090 GN=Pkn1 PE=1 SV=3                                    | 0,62 | 0,0264 |
| High   | Q9JJ43 | 4  | <b>Rbfox1</b>   | RNA binding protein fox-1 homolog 1 OS=Mus musculus OX=10090 GN=Rbfox1 PE=1 SV=3                                 | 0,61 | 0,0020 |
| Medium | Q9CR76 | 1  | <b>Tmem186</b>  | Transmembrane protein 186 OS=Mus musculus OX=10090 GN=Tmem186 PE=1 SV=2                                          | 0,59 | 0,0196 |
| High   | P62257 | 2  | <b>Ube2h</b>    | Ubiquitin-conjugating enzyme E2 H OS=Mus musculus OX=10090 GN=Ube2h PE=1 SV=1                                    | 0,56 | 0,0017 |
| High   | Q8BGF9 | 5  | <b>Slc25a44</b> | Solute carrier family 25 member 44 OS=Mus musculus OX=10090 GN=Slc25a44 PE=1 SV=1                                | 0,56 | 0,0021 |
| High   | Q8K0F1 | 4  | <b>Tbc1d23</b>  | TBC1 domain family member 23 OS=Mus musculus OX=10090 GN=Tbc1d23 PE=1 SV=1                                       | 0,52 | 0,0009 |
| High   | Q9Z0S6 | 2  | <b>Cldn10</b>   | Claudin-10 OS=Mus musculus OX=10090 GN=Cldn10 PE=1 SV=2                                                          | 0,52 | 0,0005 |

|        |        |   |                |                                                                                                               |      |        |
|--------|--------|---|----------------|---------------------------------------------------------------------------------------------------------------|------|--------|
| High   | Q8BNN1 | 3 | <b>Spata2l</b> | Spermatogenesis-associated protein 2-like protein OS=Mus musculus OX=10090 GN=Spata2l PE=1 SV=1               | 0,50 | 0,0001 |
| High   | Q8C4G9 | 2 | <b>Adgra1</b>  | Adhesion G protein-coupled receptor A1 OS=Mus musculus OX=10090 GN=Adgra1 PE=2 SV=1                           | 0,49 | 0,0002 |
| High   | B2RWJ3 | 2 | <b>Tmem240</b> | Transmembrane protein 240 OS=Mus musculus OX=10090 GN=Tmem240 PE=1 SV=1                                       | 0,46 | 0,0000 |
| High   | O35316 | 2 | <b>Slc6a6</b>  | Sodium- and chloride-dependent taurine transporter OS=Mus musculus OX=10090 GN=Slc6a6 PE=1 SV=2               | 0,41 | 0,0000 |
| Medium | Q8CIH5 | 1 | <b>Plcg2</b>   | 1-phosphatidylinositol 4,5-bisphosphate phosphodiesterase gamma-2 OS=Mus musculus OX=10090 GN=Plcg2 PE=1 SV=1 | 0,39 | 0,0003 |
| High   | O35723 | 2 | <b>Dnajb3</b>  | DnaJ homolog subfamily B member 3 OS=Mus musculus OX=10090 GN=Dnajb3 PE=2 SV=1                                | 0,34 | 0,0000 |
| High   | P97770 | 2 | <b>Thumpd3</b> | THUMP domain-containing protein 3 OS=Mus musculus OX=10090 GN=Thumpd3 PE=1 SV=1                               | 0,29 | 0,0000 |
| Medium | Q9D384 | 1 | <b>Snrnp35</b> | U11/U12 small nuclear ribonucleoprotein 35 kDa protein OS=Mus musculus OX=10090 GN=Snrnp35 PE=2 SV=1          | 0,26 | 0,0000 |
| High   | Q8C0Q9 | 1 | <b>Rapgef5</b> | Rap guanine nucleotide exchange factor 5 OS=Mus musculus OX=10090 GN=Rapgef5 PE=2 SV=2                        | 0,20 | 0,0000 |
| High   | Q60632 | 1 | <b>Nr2f1</b>   | COUP transcription factor 1 OS=Mus musculus OX=10090 GN=Nr2f1 PE=2 SV=2                                       | 0,10 | 0,0000 |
| High   | Q61738 | 2 | <b>Itga7</b>   | Integrin alpha-7 OS=Mus musculus OX=10090 GN=Itga7 PE=1 SV=3                                                  | 0,05 | 0,0000 |
| High   | Q91WK5 | 2 | <b>Gcsh</b>    | Glycine cleavage system H protein, mitochondrial OS=Mus musculus OX=10090 GN=Gcsh PE=1 SV=2                   | 0,01 | 0,0000 |
| High   | P97760 | 2 | <b>Polr2c</b>  | DNA-directed RNA polymerase II subunit RPB3 OS=Mus musculus OX=10090 GN=Polr2c PE=1 SV=2                      | 0,01 | 0,0000 |
| High   | O70456 | 2 | <b>Sfn</b>     | 14-3-3 protein sigma OS=Mus musculus OX=10090 GN=Sfn PE=1 SV=2                                                | 0,01 | 0,0000 |
| Medium | Q9CWR2 | 1 | <b>Smyd3</b>   | Histone-lysine N-methyltransferase SMYD3 OS=Mus musculus OX=10090 GN=Smyd3 PE=2 SV=1                          | 0,01 | 0,0000 |
