# Supplementary material for: Brain injury environment critically influences the connectivity of transplanted neurons
Source: bioRxiv or medRxiv preprint supplement (doi:10.1101/2021.12.13.472270), 2021-12-14
Supplement: Supplementary file [file media-6.pdf]

| Protein FDR Confidence: | Accession | # Unique Peptides | Gene symbol     | Description                                                                                                       | Abundance Ratio: (LPS) / (intact) | Abundance Ratio P-Value: (LPS) / (intact) |
|-------------------------|-----------|-------------------|-----------------|-------------------------------------------------------------------------------------------------------------------|-----------------------------------|-------------------------------------------|
| High                    | A2ALK8    | 3                 | <b>Ptpn3</b>    | Tyrosine-protein phosphatase non-receptor type 3 OS=Mus musculus OX=10090 GN=Ptpn3 PE=1 SV=1                      | 16,61                             | 0,0000                                    |
| Medium                  | Q09200    | 1                 | <b>B4galnt1</b> | Beta-1,4 N-acetylgalactosaminyltransferase 1 OS=Mus musculus OX=10090 GN=B4galnt1 PE=1 SV=1                       | 8,98                              | 0,0000                                    |
| High                    | P01867    | 3                 | <b>Igh-3</b>    | Ig gamma-2B chain C region OS=Mus musculus OX=10090 GN=Igh-3 PE=1 SV=3                                            | 5,53                              | 0,0000                                    |
| High                    | P04186    | 6                 | <b>Cfb</b>      | Complement factor B OS=Mus musculus OX=10090 GN=Cfb PE=1 SV=2                                                     | 5,24                              | 0,0000                                    |
| High                    | Q9R0H5    | 1                 | <b>Krt71</b>    | Keratin, type II cytoskeletal 71 OS=Mus musculus OX=10090 GN=Krt71 PE=1 SV=1                                      | 4,40                              | 0,0000                                    |
| Medium                  | Q8CIH5    | 1                 | <b>Plcg2</b>    | 1-phosphatidylinositol 4,5-bisphosphate phosphodiesterase gamma-2 OS=Mus musculus OX=10090 GN=Plcg2 PE=1 SV=1     | 3,80                              | 0,0000                                    |
| High                    | Q91X72    | 20                | <b>Hpx</b>      | Hemopexin OS=Mus musculus OX=10090 GN=Hpx PE=1 SV=2                                                               | 2,92                              | 0,0003                                    |
| High                    | P01864    | 3                 |                 | Ig gamma-2A chain C region secreted form OS=Mus musculus OX=10090 PE=1 SV=1                                       | 2,84                              | 0,0012                                    |
| High                    | Q09143    | 2                 | <b>Slc7a1</b>   | High affinity cationic amino acid transporter 1 OS=Mus musculus OX=10090 GN=Slc7a1 PE=1 SV=1                      | 2,65                              | 0,0016                                    |
| High                    | A2AT37    | 7                 | <b>Upf2</b>     | Regulator of nonsense transcripts 2 OS=Mus musculus OX=10090 GN=Upf2 PE=1 SV=1                                    | 2,61                              | 0,0035                                    |
| High                    | P59326    | 2                 | <b>Ythdf1</b>   | YTH domain-containing family protein 1 OS=Mus musculus OX=10090 GN=Ythdf1 PE=1 SV=1                               | 2,60                              | 0,0027                                    |
| High                    | P01837    | 3                 | <b>Igkc</b>     | Immunoglobulin kappa constant OS=Mus musculus OX=10090 GN=Igkc PE=1 SV=2                                          | 2,49                              | 0,0082                                    |
| High                    | Q61235    | 6                 | <b>Sntb2</b>    | Beta-2-syntrophin OS=Mus musculus OX=10090 GN=Sntb2 PE=1 SV=2                                                     | 2,46                              | 0,0057                                    |
| High                    | Q6NXH9    | 1                 | <b>Krt73</b>    | Keratin, type II cytoskeletal 73 OS=Mus musculus OX=10090 GN=Krt73 PE=1 SV=1                                      | 2,45                              | 0,0013                                    |
| High                    | P07309    | 2                 | <b>Ttr</b>      | Transthyretin OS=Mus musculus OX=10090 GN=Ttr PE=1 SV=1                                                           | 2,43                              | 0,0055                                    |
| High                    | Q35143    | 2                 | <b>ATP5IF1</b>  | ATPase inhibitor, mitochondrial OS=Mus musculus OX=10090 GN=ATP5IF1 PE=1 SV=2                                     | 2,43                              | 0,0046                                    |
| High                    | Q9JUJ8    | 4                 | <b>Sh3bgrl</b>  | SH3 domain-binding glutamic acid-rich-like protein OS=Mus musculus OX=10090 GN=Sh3bgrl PE=1 SV=1                  | 2,36                              | 0,0050                                    |
| High                    | P03987    | 5                 |                 | Ig gamma-3 chain C region OS=Mus musculus OX=10090 GN=PE=1 SV=2                                                   | 2,34                              | 0,0061                                    |
| High                    | Q8R332    | 2                 | <b>Nup58</b>    | Nucleoporin p58/p45 OS=Mus musculus OX=10090 GN=Nup58 PE=1 SV=1                                                   | 2,31                              | 0,0048                                    |
| High                    | Q60590    | 3                 | <b>Orm1</b>     | Alpha-1-acid glycoprotein 1 OS=Mus musculus OX=10090 GN=Orm1 PE=1 SV=1                                            | 2,30                              | 0,0115                                    |
| High                    | P62073    | 2                 | <b>Timm10</b>   | Mitochondrial import inner membrane translocase subunit Tim10 OS=Mus musculus OX=10090 GN=Timm10 PE=1 SV=1        | 2,24                              | 0,0107                                    |
| High                    | Q91Z38    | 3                 | <b>Ttc1</b>     | Tetratricopeptide repeat protein 1 OS=Mus musculus OX=10090 GN=Ttc1 PE=1 SV=1                                     | 2,21                              | 0,0086                                    |
| High                    | O88351    | 4                 | <b>Ikbkb</b>    | Inhibitor of nuclear factor kappa-B kinase subunit beta OS=Mus musculus OX=10090 GN=Ikbkb PE=1 SV=1               | 2,20                              | 0,0089                                    |
| High                    | Q9WVA2    | 2                 | <b>Timm8a1</b>  | Mitochondrial import inner membrane translocase subunit Tim8 A OS=Mus musculus OX=10090 GN=Timm8a1 PE=1 SV=1      | 2,20                              | 0,0093                                    |
| High                    | P02769    | 33                | <b>ALB</b>      | Serum albumin OS=Bos taurus OX=9913 GN=ALB PE=1 SV=4                                                              | 2,18                              | 0,0260                                    |
| High                    | P54726    | 3                 | <b>Rad23a</b>   | UV excision repair protein RAD23 homolog A OS=Mus musculus OX=10090 GN=Rad23a PE=1 SV=2                           | 2,17                              | 0,0100                                    |
| High                    | Q64436    | 3                 | <b>Atp4a</b>    | Potassium-transporting ATPase alpha chain 1 OS=Mus musculus OX=10090 GN=Atp4a PE=1 SV=3                           | 2,15                              | 0,0208                                    |
| High                    | Q9R1Z7    | 4                 | <b>Pts</b>      | 6-pyruvoyl tetrahydrobiopterin synthase OS=Mus musculus OX=10090 GN=Pts PE=1 SV=2                                 | 2,09                              | 0,0137                                    |
| High                    | Q61646    | 8                 | <b>Hp</b>       | Haptoglobin OS=Mus musculus OX=10090 GN=Hp PE=1 SV=1                                                              | 2,08                              | 0,0114                                    |
| High                    | Q9DB25    | 3                 | <b>Alg5</b>     | Dolichyl-phosphate beta-glucosyltransferase OS=Mus musculus OX=10090 GN=Alg5 PE=1 SV=1                            | 2,05                              | 0,0203                                    |
| High                    | Q8JZV7    | 2                 | <b>Amdhd2</b>   | N-acetylglucosamine-6-phosphate deacetylase OS=Mus musculus OX=10090 GN=Amdhd2 PE=1 SV=1                          | 2,03                              | 0,0268                                    |
| Medium                  | Q3UL36    | 1                 | <b>Arglu1</b>   | Arginine and glutamate-rich protein 1 OS=Mus musculus OX=10090 GN=Arglu1 PE=1 SV=2                                | 2,02                              | 0,0175                                    |
| High                    | Q9Z0S9    | 2                 | <b>Rabac1</b>   | Prenylated Rab acceptor protein 1 OS=Mus musculus OX=10090 GN=Rabac1 PE=1 SV=1                                    | 2,01                              | 0,0245                                    |
| High                    | Q91VW3    | 2                 | <b>Sh3bgrl3</b> | SH3 domain-binding glutamic acid-rich-like protein 3 OS=Mus musculus OX=10090 GN=Sh3bgrl3 PE=1 SV=1               | 2,00                              | 0,0223                                    |
| High                    | Q8BHL8    | 2                 | <b>Psmf1</b>    | Proteasome inhibitor PI31 subunit OS=Mus musculus OX=10090 GN=Psmf1 PE=1 SV=1                                     | 1,99                              | 0,0229                                    |
| High                    | P17225    | 4                 | <b>Ptbp1</b>    | Polypyrimidine tract-binding protein 1 OS=Mus musculus OX=10090 GN=Ptbp1 PE=1 SV=2                                | 1,97                              | 0,0218                                    |
| High                    | P29699    | 7                 | <b>Ahsg</b>     | Alpha-2-HS-glycoprotein OS=Mus musculus OX=10090 GN=Ahsg PE=1 SV=1                                                | 1,97                              | 0,0331                                    |
| High                    | Q8K045    | 1                 | <b>Pkn3</b>     | Serine/threonine-protein kinase N3 OS=Mus musculus OX=10090 GN=Pkn3 PE=1 SV=1                                     | 1,95                              | 0,0201                                    |
| High                    | P20918    | 18                | <b>Plg</b>      | Plasminogen OS=Mus musculus OX=10090 GN=Plg PE=1 SV=3                                                             | 1,94                              | 0,0304                                    |
| High                    | Q9DCU2    | 2                 | <b>Plip</b>     | Plasmalipin OS=Mus musculus OX=10090 GN=Plip PE=1 SV=1                                                            | 1,93                              | 0,0383                                    |
| High                    | P52503    | 5                 | <b>Ndufs6</b>   | NADH dehydrogenase [ubiquinone] iron-sulfur protein 6, mitochondrial OS=Mus musculus OX=10090 GN=Ndufs6 PE=1 SV=2 | 1,92                              | 0,0239                                    |
| High                    | P31786    | 2                 | <b>Dbi</b>      | Acyl-CoA-binding protein OS=Mus musculus OX=10090 GN=Dbi PE=1 SV=2                                                | 1,90                              | 0,0182                                    |
| High                    | Q05816    | 9                 | <b>Fabp5</b>    | Fatty acid-binding protein 5 OS=Mus musculus OX=10090 GN=Fabp5 PE=1 SV=3                                          | 1,88                              | 0,0445                                    |
| High                    | Q9ET22    | 4                 | <b>Dpp7</b>     | Dipeptidyl peptidase 2 OS=Mus musculus OX=10090 GN=Dpp7 PE=1 SV=2                                                 | 1,87                              | 0,0298                                    |
| High                    | Q03958    | 3                 | <b>Pfdn6</b>    | Prefoldin subunit 6 OS=Mus musculus OX=10090 GN=Pfdn6 PE=1 SV=1                                                   | 1,87                              | 0,0284                                    |
| High                    | P16045    | 5                 | <b>Lgals1</b>   | Galectin-1 OS=Mus musculus OX=10090 GN=Lgals1 PE=1 SV=3                                                           | 1,86                              | 0,0288                                    |
| High                    | Q8R3Q6    | 4                 | <b>Ccdc58</b>   | Coiled-coil domain-containing protein 58 OS=Mus musculus OX=10090 GN=Ccdc58 PE=1 SV=1                             | 1,86                              | 0,0476                                    |
| High                    | P08228    | 7                 | <b>Sod1</b>     | Superoxide dismutase [Cu-Zn] OS=Mus musculus OX=10090 GN=Sod1 PE=1 SV=2                                           | 1,86                              | 0,0263                                    |
| High                    | Q8VCI5    | 5                 | <b>Pex19</b>    | Peroxisomal biogenesis factor 19 OS=Mus musculus OX=10090 GN=Pex19 PE=1 SV=1                                      | 1,82                              | 0,0343                                    |
| Medium                  | Q8BL80    | 1                 | <b>Arhgap22</b> | Rho GTPase-activating protein 22 OS=Mus musculus OX=10090 GN=Arhgap22 PE=1 SV=2                                   | 1,82                              | 0,0480                                    |
| High                    | P97929    | 1                 | <b>Braca2</b>   | Breast cancer type 2 susceptibility protein homolog OS=Mus musculus OX=10090 GN=Braca2 PE=1 SV=2                  | 1,82                              | 0,0492                                    |
| High                    | Q62288    | 4                 | <b>Spock1</b>   | Testican-1 OS=Mus musculus OX=10090 GN=Spock1 PE=2 SV=2                                                           | 1,80                              | 0,0432                                    |
| High                    | P97450    | 4                 | <b>Atp5pf</b>   | ATP synthase-coupling factor 6, mitochondrial OS=Mus musculus OX=10090 GN=Atp5pf PE=1 SV=1                        | 1,77                              | 0,0389                                    |
| High                    | Q80V26    | 8                 | <b>Impad1</b>   | Golgi-resident adenosine 3',5'-bisphosphate 3'-phosphatase OS=Mus musculus OX=10090 GN=Impad1 PE=1 SV=1           | 1,77                              | 0,0396                                    |
| High                    | P21550    | 1                 | <b>Eno3</b>     | Beta-enolase OS=Mus musculus OX=10090 GN=Eno3 PE=1 SV=3                                                           | 1,77                              | 0,0405                                    |
| High                    | O08677    | 11                | <b>Kng1</b>     | Kininogen-1 OS=Mus musculus OX=10090 GN=Kng1 PE=1 SV=1                                                            | 1,76                              | 0,0475                                    |
| High                    | Q91WK5    | 2                 | <b>Gcsh</b>     | Glycine cleavage system H protein, mitochondrial OS=Mus musculus OX=10090 GN=Gcsh PE=1 SV=2                       | 1,75                              | 0,0465                                    |
| High                    | P62858    | 2                 | <b>Rps28</b>    | 40S ribosomal protein S28 OS=Mus musculus OX=10090 GN=Rps28 PE=1 SV=1                                             | 1,75                              | 0,0428                                    |
| High                    | Q9CQW0    | 2                 | <b>Emc6</b>     | ER membrane protein complex subunit 6 OS=Mus musculus OX=10090 GN=Emc6 PE=1 SV=1                                  | 1,74                              | 0,0494                                    |
| High                    | O70591    | 4                 | <b>Pfdn2</b>    | Prefoldin subunit 2 OS=Mus musculus OX=10090 GN=Pfdn2 PE=1 SV=2                                                   | 1,72                              | 0,0489                                    |
| High                    | Q923T9    | 15                | <b>Camk2g</b>   | Calcium/calmodulin-dependent protein kinase type II subunit gamma OS=Mus musculus OX=10090 GN=Camk2g PE=1 SV=1    | 0,56                              | 0,0470                                    |
| High                    | Q9QW16    | 53                | <b>Srcin1</b>   | SRC kinase signaling inhibitor 1 OS=Mus musculus OX=10090 GN=Srcin1 PE=1 SV=2                                     | 0,56                              | 0,0423                                    |
| High                    | Q4ACU6    | 53                | <b>Shank3</b>   | SH3 and multiple ankyrin repeat domains protein 3 OS=Mus musculus OX=10090 GN=Shank3 PE=1 SV=3                    | 0,55                              | 0,0408                                    |
| High                    | F65EU4    | 51                | <b>Syngap1</b>  | Ras/Rap GTPase-activating protein SynGAP OS=Mus musculus OX=10090 GN=Syngap1 PE=1 SV=2                            | 0,55                              | 0,0367                                    |
| High                    | Q60698    | 1                 | <b>Ski</b>      | Ski oncogene OS=Mus musculus OX=10090 GN=Ski PE=1 SV=2                                                            | 0,54                              | 0,0330                                    |
| High                    | Q68EF6    | 25                | <b>Begain</b>   | Brain-enriched guanylate kinase-associated protein OS=Mus musculus OX=10090 GN=Begain PE=1 SV=2                   | 0,53                              | 0,0292                                    |
| High                    | Q9CXS4    | 11                | <b>Cenpv</b>    | Centromere protein V OS=Mus musculus OX=10090 GN=Cenpv PE=1 SV=2                                                  | 0,53                              | 0,0468                                    |
| High                    | Q80TE7    | 45                | <b>Lrrc7</b>    | Leucine-rich repeat-containing protein 7 OS=Mus musculus OX=10090 GN=Lrrc7 PE=1 SV=2                              | 0,51                              | 0,0415                                    |
| High                    | P62911    | 6                 | <b>Rpl32</b>    | 60S ribosomal protein L32 OS=Mus musculus OX=10090 GN=Rpl32 PE=1 SV=2                                             | 0,50                              | 0,0248                                    |
| High                    | P62892    | 1                 | <b>Rpl39</b>    | 60S ribosomal protein L39 OS=Mus musculus OX=10090 GN=Rpl39 PE=1 SV=2                                             | 0,50                              | 0,0443                                    |
| High                    | Q3UXZ6    | 17                | <b>Fam81a</b>   | Protein FAM81A OS=Mus musculus OX=10090 GN=Fam81a PE=1 SV=2                                                       | 0,50                              | 0,0359                                    |
| High                    | P83093    | 9                 | <b>Stim2</b>    | Stromal interaction molecule 2 OS=Mus musculus OX=10090 GN=Stim2 PE=1 SV=2                                        | 0,49                              | 0,0363                                    |

|        |        |    |                 |                                                                                                                          |      |        |
|--------|--------|----|-----------------|--------------------------------------------------------------------------------------------------------------------------|------|--------|
| High   | Q80W54 | 7  | <b>Zmpste24</b> | CAAX prenyl protease 1 homolog OS=Mus musculus OX=10090 GN=Zmpste24 PE=1 SV=2                                            | 0,49 | 0,0448 |
| High   | P41105 | 6  | <b>Rpl28</b>    | 60S ribosomal protein L28 OS=Mus musculus OX=10090 GN=Rpl28 PE=1 SV=2                                                    | 0,48 | 0,0158 |
| Medium | Q9QX98 | 1  | <b>Ptf1a</b>    | Pancreas transcription factor 1 subunit alpha OS=Mus musculus OX=10090 GN=Ptf1a PE=1 SV=1                                | 0,46 | 0,0267 |
| High   | Q9D338 | 6  | <b>Mrpl19</b>   | 39S ribosomal protein L19, mitochondrial OS=Mus musculus OX=10090 GN=Mrpl19 PE=1 SV=1                                    | 0,46 | 0,0201 |
| High   | Q8C015 | 21 | <b>Pak5</b>     | Serine/threonine-protein kinase PAK 5 OS=Mus musculus OX=10090 GN=Pak5 PE=1 SV=1                                         | 0,46 | 0,0200 |
| High   | B2RWJ3 | 2  | <b>Tmem240</b>  | Transmembrane protein 240 OS=Mus musculus OX=10090 GN=Tmem240 PE=1 SV=1                                                  | 0,45 | 0,0427 |
| High   | Q8K1A5 | 1  | <b>Tmem41b</b>  | Transmembrane protein 41B OS=Mus musculus OX=10090 GN=Tmem41b PE=1 SV=1                                                  | 0,45 | 0,0294 |
| Medium | Q8BH32 | 1  | <b>Susd4</b>    | Sushi domain-containing protein 4 OS=Mus musculus OX=10090 GN=Susd4 PE=2 SV=1                                            | 0,45 | 0,0300 |
| High   | Q8R2U6 | 3  | <b>Nudt4</b>    | Diphosphoinositol polyphosphate phosphohydrolase 2 OS=Mus musculus OX=10090 GN=Nudt4 PE=1 SV=1                           | 0,43 | 0,0410 |
| High   | P02463 | 5  | <b>Col4a1</b>   | Collagen alpha-1(IV) chain OS=Mus musculus OX=10090 GN=Col4a1 PE=1 SV=4                                                  | 0,41 | 0,0060 |
| High   | Q922U1 | 4  | <b>Prpf3</b>    | U4/U6 small nuclear ribonucleoprotein Prp3 OS=Mus musculus OX=10090 GN=Prpf3 PE=1 SV=1                                   | 0,41 | 0,0334 |
| High   | Q80XU3 | 2  | <b>Nucks1</b>   | Nuclear ubiquitous casein and cyclin-dependent kinase substrate 1 OS=Mus musculus OX=10090 GN=Nucks1 PE=1 SV=1           | 0,41 | 0,0108 |
| Medium | Q4ZF3  | 1  | <b>Ddx49</b>    | Probable ATP-dependent RNA helicase DDX49 OS=Mus musculus OX=10090 GN=Ddx49 PE=2 SV=1                                    | 0,41 | 0,0073 |
| High   | Q91YW3 | 4  | <b>Dnajc3</b>   | DnaJ homolog subfamily C member 3 OS=Mus musculus OX=10090 GN=Dnajc3 PE=1 SV=1                                           | 0,39 | 0,0295 |
| High   | Q5XJY4 | 2  | <b>Parl</b>     | Presenilin-associated rhomboid-like protein, mitochondrial OS=Mus musculus OX=10090 GN=Parl PE=1 SV=1                    | 0,38 | 0,0345 |
| High   | Q35316 | 2  | <b>Slc6a6</b>   | Sodium- and chloride-dependent taurine transporter OS=Mus musculus OX=10090 GN=Slc6a6 PE=1 SV=2                          | 0,37 | 0,0137 |
| High   | Q9EQJ9 | 9  | <b>Magi3</b>    | Membrane-associated guanylate kinase, WW and PDZ domain-containing protein 3 OS=Mus musculus OX=10090 GN=Magi3 PE=1 SV=2 | 0,36 | 0,0208 |
| High   | Q99KN2 | 2  | <b>Ciao1</b>    | SV=1                                                                                                                     | 0,35 | 0,0264 |
| High   | Q99LC8 | 4  | <b>Eif2b1</b>   | Translation initiation factor eIF-2B subunit alpha OS=Mus musculus OX=10090 GN=Eif2b1 PE=1 SV=1                          | 0,35 | 0,0097 |
| High   | Q9CQ00 | 1  | <b>Smim8</b>    | Small integral membrane protein 8 OS=Mus musculus OX=10090 GN=Smim8 PE=1 SV=1                                            | 0,33 | 0,0059 |
| High   | Q8BVP5 | 1  | <b>Csnk1g2</b>  | Casein kinase I isoform gamma-2 OS=Mus musculus OX=10090 GN=Csnk1g2 PE=1 SV=1                                            | 0,33 | 0,0025 |
| High   | Q91YR7 | 13 | <b>Prpf6</b>    | Pre-mRNA-processing factor 6 OS=Mus musculus OX=10090 GN=Prpf6 PE=1 SV=1                                                 | 0,32 | 0,0009 |
| High   | Q6PFX7 | 3  | <b>Nyap1</b>    | Neuronal tyrosine-phosphorylated phosphoinositide-3-kinase adapter 1 OS=Mus musculus OX=10090 GN=Nyap1 PE=1 SV=1         | 0,32 | 0,0222 |
| Medium | Q9QXM1 | 2  | <b>Jmy</b>      | Junction-mediating and -regulatory protein OS=Mus musculus OX=10090 GN=Jmy PE=1 SV=1                                     | 0,32 | 0,0217 |
| High   | Q91XY4 | 2  | <b>Pcdhga4</b>  | Protocadherin gamma-A4 OS=Mus musculus OX=10090 GN=Pcdhga4 PE=1 SV=1                                                     | 0,30 | 0,0001 |
| High   | Q8K0F1 | 4  | <b>Tbc1d23</b>  | TBC1 domain family member 23 OS=Mus musculus OX=10090 GN=Tbc1d23 PE=1 SV=1                                               | 0,29 | 0,0019 |
| High   | Q9QY14 | 2  | <b>Dnajb12</b>  | DnaJ homolog subfamily B member 12 OS=Mus musculus OX=10090 GN=Dnajb12 PE=1 SV=2                                         | 0,28 | 0,0001 |
| High   | Q8C4G9 | 2  | <b>Adgra1</b>   | Adhesion G protein-coupled receptor A1 OS=Mus musculus OX=10090 GN=Adgra1 PE=2 SV=1                                      | 0,28 | 0,0011 |
| Medium | Q8BGE5 | 1  | <b>Fancm</b>    | Fanconi anemia group M protein homolog OS=Mus musculus OX=10090 GN=Fancm PE=1 SV=3                                       | 0,27 | 0,0000 |
| High   | P97770 | 2  | <b>Thumpd3</b>  | THUMP domain-containing protein 3 OS=Mus musculus OX=10090 GN=Thumpd3 PE=1 SV=1                                          | 0,25 | 0,0000 |
| High   | Q6GQW0 | 4  | <b>Btbd11</b>   | SV=2                                                                                                                     | 0,24 | 0,0004 |
| Medium | Q9D384 | 1  | <b>Snrnp35</b>  | U11/U12 small nuclear ribonucleoprotein 35 kDa protein OS=Mus musculus OX=10090 GN=Snrnp35 PE=2 SV=1                     | 0,24 | 0,0000 |
| High   | Q9Z2E9 | 2  | <b>Bscl2</b>    | Seipin OS=Mus musculus OX=10090 GN=Bscl2 PE=1 SV=2                                                                       | 0,23 | 0,0002 |
| High   | Q9R0M0 | 2  | <b>Celsr2</b>   | Cadherin EGF LAG seven-pass G-type receptor 2 OS=Mus musculus OX=10090 GN=Celsr2 PE=1 SV=3                               | 0,23 | 0,0004 |
| High   | P60191 | 5  | <b>Rims4</b>    | Regulating synaptic membrane exocytosis protein 4 OS=Mus musculus OX=10090 GN=Rims4 PE=1 SV=1                            | 0,22 | 0,0000 |
| High   | P63054 | 3  | <b>Pcp4</b>     | Calmodulin regulator protein PCP4 OS=Mus musculus OX=10090 GN=Pcp4 PE=3 SV=2                                             | 0,18 | 0,0000 |
| High   | P58064 | 2  | <b>Mrps6</b>    | 28S ribosomal protein S6, mitochondrial OS=Mus musculus OX=10090 GN=Mrps6 PE=1 SV=3                                      | 0,17 | 0,0000 |
| High   | Q8C0Q9 | 1  | <b>Rapgef5</b>  | Rap guanine nucleotide exchange factor 5 OS=Mus musculus OX=10090 GN=Rapgef5 PE=2 SV=2                                   | 0,16 | 0,0000 |
| High   | Q6ZWQ7 | 3  | <b>Spcs3</b>    | Signal peptidase complex subunit 3 OS=Mus musculus OX=10090 GN=Spcs3 PE=1 SV=1                                           | 0,16 | 0,0000 |
| High   | Q35963 | 4  | <b>Rab33b</b>   | Ras-related protein Rab-33B OS=Mus musculus OX=10090 GN=Rab33b PE=1 SV=1                                                 | 0,16 | 0,0000 |
| High   | Q99N92 | 2  | <b>Mrpl27</b>   | 39S ribosomal protein L27, mitochondrial OS=Mus musculus OX=10090 GN=Mrpl27 PE=1 SV=1                                    | 0,15 | 0,0000 |
| High   | P62984 | 1  | <b>Uba52</b>    | Ubiquitin-60S ribosomal protein L40 OS=Mus musculus OX=10090 GN=Uba52 PE=1 SV=2                                          | 0,15 | 0,0000 |
| High   | Q61738 | 2  | <b>Itga7</b>    | Integrin alpha-7 OS=Mus musculus OX=10090 GN=Itga7 PE=1 SV=3                                                             | 0,11 | 0,0000 |
| High   | P56387 | 3  | <b>Dynlt3</b>   | Dynein light chain Tctex-type 3 OS=Mus musculus OX=10090 GN=Dynlt3 PE=1 SV=1                                             | 0,05 | 0,0000 |
| Medium | Q9D706 | 1  | <b>Rpap3</b>    | RNA polymerase II-associated protein 3 OS=Mus musculus OX=10090 GN=Rpap3 PE=1 SV=1                                       | 0,02 | 0,0000 |
| High   | Q80TH2 | 1  | <b>Erbin</b>    | Erbin OS=Mus musculus OX=10090 GN=Erbin PE=1 SV=3                                                                        | 0,01 | 0,0000 |
| High   | Q8BUM6 | 1  | <b>Fam163b</b>  | Protein FAM163B OS=Mus musculus OX=10090 GN=Fam163b PE=1 SV=1                                                            | 0,01 | 0,0000 |
| High   | Q61762 | 1  | <b>Kcna5</b>    | Potassium voltage-gated channel subfamily A member 5 OS=Mus musculus OX=10090 GN=Kcna5 PE=2 SV=2                         | 0,01 | 0,0000 |
| High   | O70456 | 2  | <b>Sfn</b>      | 14-3-3 protein sigma OS=Mus musculus OX=10090 GN=Sfn PE=1 SV=2                                                           | 0,01 | 0,0000 |
| Medium | D3Z7Q2 | 1  | <b>Smim20</b>   | Small integral membrane protein 20 OS=Mus musculus OX=10090 GN=Smim20 PE=1 SV=1                                          | 0,01 | 0,0000 |
| High   | B7ZMP1 | 3  | <b>Xpnpep3</b>  | Xaa-Pro aminopeptidase 3 OS=Mus musculus OX=10090 GN=Xpnpep3 PE=1 SV=1                                                   | 0,01 | 0,0000 |
