# Supplementary material for: Brain injury environment critically influences the connectivity of transplanted neurons
Source: bioRxiv or medRxiv preprint supplement (doi:10.1101/2021.12.13.472270), 2021-12-14
Supplement: Supplementary file [file media-7.pdf]

**enriched GO terms of increased proteins (biological process)**

| GO Term    | Description                                               | P-value | FDR q-value | Enrichment | N    | B  | n  | b | Genes                                                                                                                                                          |
|------------|-----------------------------------------------------------|---------|-------------|------------|------|----|----|---|----------------------------------------------------------------------------------------------------------------------------------------------------------------|
| GO:0072321 | chaperone-mediated protein transport                      | 7.05E-5 | 8.03E-1     | 33,65      | 4935 | 8  | 55 | 3 | [Timm8a1 - translocase of inner mitochondrial membrane 8a1, Timm10 - translocase of inner mitochondrial membrane 10, Pex19 - peroxisomal biogenesis factor 19] |
| GO:0006953 | acute-phase response                                      | 1.49E-4 | 8.46E-1     | 26,92      | 4935 | 10 | 55 | 3 | [Ahsg - alpha-2-hs-glycoprotein, Hp - haptoglobin, Orm1 - orosomuroid 1]                                                                                       |
| GO:0050853 | B cell receptor signaling pathway                         | 3.46E-4 | 1,00E+00    | 20,71      | 4935 | 13 | 55 | 3 | [Igkc - immunoglobulin kappa constant, Igkg2b - immunoglobulin heavy constant gamma 2b, Plcg2 - phospholipase c, gamma 2]                                      |
| GO:0002526 | acute inflammatory response                               | 4.37E-4 | 1,00E+00    | 19,23      | 4935 | 14 | 55 | 3 | [Ahsg - alpha-2-hs-glycoprotein, Hp - haptoglobin, Orm1 - orosomuroid 1]                                                                                       |
| GO:0030183 | B cell differentiation                                    | 5.42E-4 | 1,00E+00    | 17,95      | 4935 | 15 | 55 | 3 | [Igkc - immunoglobulin kappa constant, Lgals1 - lectin, galactose binding, soluble 1, Plcg2 - phospholipase c, gamma 2]                                        |
| GO:0002313 | mature B cell differentiation involved in immune response | 7.21E-4 | 1,00E+00    | 44,86      | 4935 | 4  | 55 | 2 | [Lgals1 - lectin, galactose binding, soluble 1, Plcg2 - phospholipase c, gamma 2]                                                                              |
| GO:0006956 | complement activation                                     | 9.5E-4  | 1,00E+00    | 14,95      | 4935 | 18 | 55 | 3 | [Igkc - immunoglobulin kappa constant, Cfb - complement factor b, Igkg2b - immunoglobulin heavy constant gamma 2b]                                             |

**enriched GO terms of decreased proteins (biological process)**

| GO Term    | Description                   | P-value | FDR q-value | Enrichment | N    | B | n  | b | Genes                                                                                                                     |
|------------|-------------------------------|---------|-------------|------------|------|---|----|---|---------------------------------------------------------------------------------------------------------------------------|
| GO:0036297 | interstrand cross-link repair | 1.55E-4 | 1,00E+00    | 79,60      | 4935 | 2 | 62 | 2 | [Nucks1 - nuclear casein kinase and cyclin-dependent kinase substrate 1, Fancm - fanconi anemia, complementation group m] |
